# Supplementary material
Source: HighWire-hosted journal article supplement (https://tobaccocontrol.bmj.com/highwire/filestream/165743/field_highwire_adjunct_files/0/tc-2022-057655supp001_data_supplement.pdf)
Supplement: tc-2022-057655supp001_data_supplement.pdf [file tc-2022-057655supp001_data_supplement.pdf]

## Supplementary material

### Contents

|                                                                                                                  |    |
|------------------------------------------------------------------------------------------------------------------|----|
| Figure S1. Tobacco and vaping life history Markov model .....                                                    | 3  |
| Table S1: Seven smoking and Vaping States used in the Multistate Life-table Model.....                           | 3  |
| Table S2. Baseline annual transition probabilities based on data reported by Doan et al. 2020 <sup>5</sup> ..... | 4  |
| Appendix A: Tobacco-related disease models .....                                                                 | 5  |
| Appendix B: Epidemiological inputs .....                                                                         | 6  |
| Table S3. CHD input parameters .....                                                                             | 6  |
| Table S4. Stroke input parameters.....                                                                           | 7  |
| Table S5. Lung cancer input parameters.....                                                                      | 9  |
| Table S6. Head and neck cancer input parameters .....                                                            | 10 |
| Table S7. Esophageal cancer input parameters .....                                                               | 12 |
| Table S8. Stomach cancer input parameters .....                                                                  | 13 |
| Table S9. Liver cancer input parameters.....                                                                     | 15 |
| Table S10. Pancreatic cancer input parameters .....                                                              | 16 |
| Table S11. Cervical cancer input parameters.....                                                                 | 18 |
| Table S12. Bladder cancer input parameters.....                                                                  | 19 |
| Table S13. Kidney cancer input parameters .....                                                                  | 20 |
| Table S14. Endometrial cancer input parameters .....                                                             | 22 |
| Table S15. Melanoma input parameters.....                                                                        | 23 |
| Table S16. Thyroid cancer input parameters .....                                                                 | 24 |
| Table S17. COPD input parameters.....                                                                            | 26 |
| Table S18. LRTI input parameters .....                                                                           | 27 |
| Table S19. Future APC trends in incidence, CFR and remission.....                                                | 30 |
| Appendix C: Association of smoking and vaping with disease incidence rates.....                                  | 31 |
| Health impact of changing exposure to tobacco smoke.....                                                         | 31 |
| Relative risks of smoking-related diseases.....                                                                  | 31 |
| Table S20. Relative risks of smoking-related diseases for current versus never smokers ..                        | 32 |

|                                                                                                                                                                                                                                                                                                                          |    |
|--------------------------------------------------------------------------------------------------------------------------------------------------------------------------------------------------------------------------------------------------------------------------------------------------------------------------|----|
| Table S21. Regression coefficients used to estimate declining risks of disease with smoking cessation.....                                                                                                                                                                                                               | 33 |
| Appendix D: Expert knowledge elicitation process .....                                                                                                                                                                                                                                                                   | 34 |
| Table S22. Co-authors estimates of the effect of denicotinisation on smoking prevalence .....                                                                                                                                                                                                                            | 34 |
| Figure S2. Probability density function applied to average effect of denicotinisation on smoking cessation .....                                                                                                                                                                                                         | 35 |
| Table S23. Estimated smoking prevalence (20+ year olds) in Aotearoa/New Zealand by policy scenario for 2020, 2025, 2030, and 2040 by sex and ethnic group .....                                                                                                                                                          | 37 |
| Table S24. Absolute change in premature deaths (i.e., before age 75 years).....                                                                                                                                                                                                                                          | 38 |
| Table S25. Relative percentage change in premature deaths (i.e., before age 75 years) ...                                                                                                                                                                                                                                | 39 |
| Figure S3. Comparison of total health gains from tobacco endgame strategies modelled in this paper, with those we have previously modelled for the ANZ population of food taxes and subsidies <sup>14</sup> , colorectal cancer screening <sup>15</sup> , and 10% per annum increases in tobacco tax <sup>16</sup> ..... | 40 |
| Table S26. Health gain (in HALYs gained; 3% discount rate) per 1,000 people alive in 2020 (base-year) in Aotearoa/New Zealand by the modelled policies, by timeline into the future .....                                                                                                                                | 41 |
| Table S27. Sensitivity of Health gains results to policy effect specifications* .....                                                                                                                                                                                                                                    | 42 |
| References .....                                                                                                                                                                                                                                                                                                         | 43 |

Figure S1. Tobacco and vaping life history Markov model

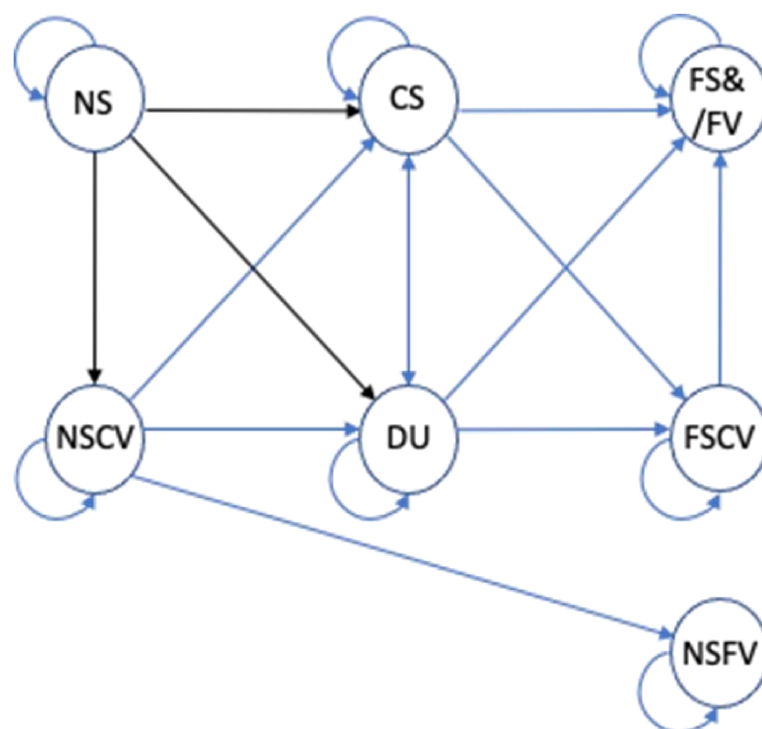

NS = never smoker, CS = current smoker, FS & FV = former smoker and former vaper; NSCV = never smoker current vaper; DU = dual user; FSCV = former smoker current vaper; NSFV = never smoker former vaper.

Table S1: Seven smoking and Vaping States used in the Multistate Life-table Model

| Smoking and/or Vaping State <sup>a</sup>   | Definition                                                                                                                                                                                                                                                       |
|--------------------------------------------|------------------------------------------------------------------------------------------------------------------------------------------------------------------------------------------------------------------------------------------------------------------|
| NS (never smoker)                          | 'A person who has never smoked at all or has never regularly smoked one or more manufactured or RYO tobacco cigarettes per day.' <sup>1,2</sup>                                                                                                                  |
| NSCV (never smoker, current vaper)         | 'As above for NS and currently vapes daily (i.e., "do you now use an e-cigarette every day, some days, or not at all?")' <sup>1,3</sup>                                                                                                                          |
| CS (current smoker)                        | 'A person who currently smokes one or more manufactured or RYO tobacco cigarettes per day.' <sup>1</sup>                                                                                                                                                         |
| DU (dual user – both vaping and smoking)   | 'As above for CS and who currently vapes daily (i.e., "Do you now use an e-cigarette every day, some days, or not at all?")' <sup>1,3</sup>                                                                                                                      |
| FS&/FV (former smoker and/or former vaper) | A person who currently neither smokes or vapes, but previously either smoked one or more manufactured or RYO tobacco cigarettes per day and/or previously vaped daily. <sup>1,2</sup>                                                                            |
| FSCV (former smoker and current vaper)     | 'A person who does not smoke currently, but previously smoked one or more manufactured or RYO tobacco cigarettes per day' <sup>1,2</sup> and 'currently vapes daily (i.e., "do you now use an e-cigarette every day, some days, or not at all?")' <sup>1-3</sup> |
| NSFV (never smoker and former vaper)       | As above for NS and previously vaped daily.                                                                                                                                                                                                                      |

<sup>a</sup>As per the definitions described in Petrović-van der Deen et al 2019.<sup>4</sup> RYO: roll-your-own

Table S2. Baseline annual transition probabilities based on data reported by Doan et al. 2020<sup>5</sup>

| <b>Transitions</b>                                                                        | <b>Age 20-44</b> | <b>Age 45+</b> |
|-------------------------------------------------------------------------------------------|------------------|----------------|
| CS=>DU (smokers adopting dual use)                                                        | 8.4%             | 5.3%           |
| CS=>FS (smokers quitting all nicotine)                                                    | 8.6%             | 14.6%          |
| CS=>FSCV (smokers becoming vapers)                                                        | 3.5%             | 4.4%           |
| NSCV=>CS (vapers becoming smokers)                                                        | 13.8%            | 15.5%          |
| NSCV=>DU (vapers adopting dual use)                                                       | 15.4%            | 10.9%          |
| NSCV=>NSFV (vapers quitting vaping)                                                       | 22.1%            | 20.5%          |
| DU=>CS (dual users becoming just smokers)                                                 | 13.7%            | 16.2%          |
| DU=> FS&/FV (dual users quitting all nicotine)                                            | 17.9%            | 20.0%          |
| DU=>FSCV (dual users becoming just vapers)                                                | 14.8%            | 18.9%          |
| FSCV=> FS&/FV (vapers quitting all nicotine)                                              | 22.1%            | 20.5%          |
| FSCV=> CS (former smokers, who became exclusive vapers, who go back to exclusive smoking) | 13.8%            | 15.5%          |

## Appendix A: Tobacco-related disease models<sup>1</sup>

There are many diseases associated with smoking, with varying evidence in terms of the contribution of tobacco use to their incidence. In principle, we prioritised inclusion in the model for: 1) diseases which were included as smoking-related in the New Zealand Burden of Disease Study<sup>6</sup>; 2) cancers that were found to have a significant association with smoking in the New Zealand Cancer Trends study<sup>7</sup>; and 3) other smoking-related diseases that contributed to at least 0.5% of the total disease burden in New Zealand in 2006 (as measured in DALYs in the NZBDS). Diseases needed to meet criteria 1 and 3 or criteria 2 to be included in the model. Most of the included diseases were chronic diseases (e.g. various cancers) with the exception of acute lower respiratory tract infections.

Some diseases with relatively high relative risks (RRs) were excluded such as age-related macular degeneration (ARMD) and peripheral vascular disease, as these each make up <0.5% of the total disease burden in New Zealand (and therefore would contribute negligible health gains in a smoking intervention model). Also, data availability and reliability were poor for the following conditions: gum disease, impotence, female infertility, hip fracture risk, fire-related injuries and other injuries, and mental health effects such as depression, anxiety, and for the psychological state of being “addicted” to tobacco. We did not include diseases from second-hand smoke and smoking in pregnancy as this was deemed too complex for our macro-simulation modelling – thus there is an inherent bias in our modelling to underestimate health gains from tobacco reduction (albeit probably slightly). Regarding female breast cancer IARC states “limited” evidence for the association with smoking<sup>8</sup>, therefore we did not include it. Last, we did not include “ovary mucinous” cancer, as this was not included in the NZBDS and would be a minor contributor to total health gains (even though IARC states that there is sufficient evidence for an association with smoking). Also of note, we included three diseases for which smoking appears to have protective effects: melanoma, thyroid cancer and endometrial cancer (based on the Cancer Trends study)<sup>7</sup>.

---

<sup>1</sup> The text presented in this section was reproduced from the supplementary material provided in Blakely et al. 2015. The full methodological appendix is available at: <https://doi.org/a0.1371/journal/pmed/10011856.s006>

## Appendix B: Epidemiological inputs

The tables below present the tobacco-related diseases baseline epidemiological inputs into the multistate life table models

Table S3. CHD input parameters

| Sex    | Ethnic group | Age group (years) | Incidence rate per 100,000 | Case-fatality rate | Prevalence per 1000 | Disability rate |
|--------|--------------|-------------------|----------------------------|--------------------|---------------------|-----------------|
| Male   | Māori        | 0-4               | 0.0                        | 0.000              | 0.0                 | 0.105           |
|        |              | 5-9               | 0.0                        | 0.000              | 0.0                 | 0.105           |
|        |              | 10-14             | 0.0                        | 0.000              | 0.0                 | 0.105           |
|        |              | 15-19             | 0.2                        | 0.000              | 0.0                 | 0.105           |
|        |              | 20-24             | 8.8                        | 0.000              | 0.2                 | 0.105           |
|        |              | 25-29             | 27.5                       | 0.006              | 1.1                 | 0.105           |
|        |              | 30-34             | 44.7                       | 0.026              | 2.6                 | 0.105           |
|        |              | 35-39             | 125.4                      | 0.029              | 5.9                 | 0.105           |
|        |              | 40-44             | 250.4                      | 0.030              | 13.8                | 0.105           |
|        |              | 45-49             | 487.0                      | 0.038              | 27.6                | 0.108           |
|        |              | 50-54             | 846.3                      | 0.040              | 52.0                | 0.108           |
|        |              | 55-59             | 1249.4                     | 0.035              | 88.2                | 0.100           |
|        |              | 60-64             | 1796.2                     | 0.034              | 138.1               | 0.100           |
|        |              | 65-69             | 2333.5                     | 0.032              | 200.8               | 0.083           |
|        |              | 70-74             | 2769.0                     | 0.034              | 269.6               | 0.083           |
|        |              | 75-79             | 3009.7                     | 0.041              | 331.9               | 0.069           |
|        |              | 80-84             | 2793.6                     | 0.050              | 375.6               | 0.069           |
|        |              | 85-89             | 2676.4                     | 0.071              | 386.8               | 0.061           |
| 90-94  | 4368.9       | 0.111             | 385.1                      | 0.061              |                     |                 |
| 95+    | 6671.4       | 0.168             | 392.6                      | 0.061              |                     |                 |
| Female | Māori        | 0-4               | 0.0                        | 0.000              | 0.0                 | 0.096           |
|        |              | 5-9               | 0.0                        | 0.000              | 0.0                 | 0.096           |
|        |              | 10-14             | 0.0                        | 0.004              | 0.0                 | 0.096           |
|        |              | 15-19             | 0.9                        | 0.085              | 0.0                 | 0.096           |
|        |              | 20-24             | 13.9                       | 0.165              | 0.3                 | 0.096           |
|        |              | 25-29             | 30.4                       | 0.089              | 1.1                 | 0.096           |
|        |              | 30-34             | 29.8                       | 0.033              | 2.2                 | 0.096           |
|        |              | 35-39             | 46.6                       | 0.027              | 3.6                 | 0.096           |
|        |              | 40-44             | 130.0                      | 0.027              | 6.9                 | 0.096           |
|        |              | 45-49             | 290.3                      | 0.020              | 15.9                | 0.112           |
|        |              | 50-54             | 459.2                      | 0.017              | 32.3                | 0.112           |
|        |              | 55-59             | 650.4                      | 0.017              | 54.8                | 0.124           |
|        |              | 60-64             | 1053.5                     | 0.023              | 87.2                | 0.124           |
|        |              | 65-69             | 1401.6                     | 0.027              | 130.0               | 0.110           |
|        |              | 70-74             | 1690.4                     | 0.031              | 176.7               | 0.110           |
|        |              | 75-79             | 2245.6                     | 0.045              | 224.2               | 0.101           |
|        |              | 80-84             | 2870.6                     | 0.069              | 268.4               | 0.101           |
|        |              | 85-89             | 2999.2                     | 0.103              | 289.6               | 0.090           |
| 90-94  | 3085.3       | 0.176             | 262.8                      | 0.090              |                     |                 |
| 95+    | 3996.0       | 0.339             | 171.9                      | 0.090              |                     |                 |
| Male   | non-Māori    | 0-4               | 0.0                        | 0.000              | 0.0                 | 0.079           |
|        |              | 5-9               | 0.0                        | 0.000              | 0.0                 | 0.079           |
|        |              | 10-14             | 0.0                        | 0.002              | 0.0                 | 0.079           |
|        |              | 15-19             | 0.4                        | 0.038              | 0.0                 | 0.079           |
|        |              | 20-24             | 8.5                        | 0.074              | 0.2                 | 0.079           |

|        |           |       |        |       |       |       |
|--------|-----------|-------|--------|-------|-------|-------|
|        |           | 25-29 | 21.7   | 0.040 | 0.8   | 0.079 |
|        |           | 30-34 | 29.3   | 0.018 | 1.9   | 0.079 |
|        |           | 35-39 | 75.9   | 0.012 | 4.1   | 0.079 |
|        |           | 40-44 | 165.8  | 0.013 | 9.6   | 0.079 |
|        |           | 45-49 | 302.9  | 0.016 | 19.8  | 0.088 |
|        |           | 50-54 | 500.5  | 0.015 | 37.0  | 0.088 |
|        |           | 55-59 | 763.1  | 0.015 | 63.1  | 0.088 |
|        |           | 60-64 | 1109.7 | 0.017 | 99.7  | 0.088 |
|        |           | 65-69 | 1570.9 | 0.018 | 148.7 | 0.086 |
|        |           | 70-74 | 2071.5 | 0.020 | 209.4 | 0.086 |
|        |           | 75-79 | 2683.9 | 0.026 | 277.5 | 0.083 |
|        |           | 80-84 | 3562.0 | 0.042 | 348.3 | 0.083 |
|        |           | 85-89 | 4498.6 | 0.079 | 405.2 | 0.072 |
|        |           | 90-94 | 4944.0 | 0.151 | 410.1 | 0.072 |
|        |           | 95+   | 5201.0 | 0.301 | 296.2 | 0.072 |
| Female | non-Māori | 0-4   | 0.0    | 0.000 | 0.0   | 0.069 |
|        |           | 5-9   | 0.0    | 0.000 | 0.0   | 0.069 |
|        |           | 10-14 | 0.0    | 0.000 | 0.0   | 0.069 |
|        |           | 15-19 | 0.1    | 0.000 | 0.0   | 0.069 |
|        |           | 20-24 | 7.0    | 0.000 | 0.1   | 0.069 |
|        |           | 25-29 | 19.7   | 0.001 | 0.8   | 0.069 |
|        |           | 30-34 | 16.4   | 0.002 | 1.8   | 0.069 |
|        |           | 35-39 | 21.2   | 0.003 | 2.6   | 0.069 |
|        |           | 40-44 | 50.4   | 0.006 | 4.2   | 0.069 |
|        |           | 45-49 | 104.6  | 0.007 | 7.7   | 0.086 |
|        |           | 50-54 | 198.9  | 0.005 | 14.7  | 0.086 |
|        |           | 55-59 | 350.4  | 0.006 | 27.4  | 0.089 |
|        |           | 60-64 | 551.5  | 0.010 | 47.4  | 0.089 |
|        |           | 65-69 | 864.6  | 0.012 | 76.9  | 0.093 |
|        |           | 70-74 | 1258.7 | 0.015 | 118.7 | 0.093 |
|        |           | 75-79 | 1786.0 | 0.021 | 171.8 | 0.093 |
|        |           | 80-84 | 2495.9 | 0.032 | 234.9 | 0.093 |
|        |           | 85-89 | 3131.2 | 0.062 | 294.8 | 0.086 |
|        |           | 90-94 | 3297.2 | 0.144 | 303.7 | 0.086 |
|        |           | 95+   | 3388.0 | 0.344 | 187.0 | 0.086 |

Table S4. Stroke input parameters

| Sex  | Ethnic group | Age group (years) | Incidence rate per 100,000 | Case-fatality rate | Prevalence per 1000 | Disability rate |
|------|--------------|-------------------|----------------------------|--------------------|---------------------|-----------------|
| Male | Māori        | 0-4               | 0.0                        | 0.000              | 0.0                 | 0.396           |
|      |              | 5-9               | 0.0                        | 0.006              | 0.0                 | 0.396           |
|      |              | 10-14             | 0.0                        | 0.067              | 0.0                 | 0.396           |
|      |              | 15-19             | 0.0                        | 0.122              | 0.0                 | 0.396           |
|      |              | 20-24             | 0.0                        | 0.089              | 0.0                 | 0.396           |
|      |              | 25-29             | 2.1                        | 0.042              | 0.2                 | 0.396           |
|      |              | 30-34             | 15.1                       | 0.089              | 0.4                 | 0.396           |
|      |              | 35-39             | 51.8                       | 0.074              | 1.6                 | 0.396           |
|      |              | 40-44             | 81.2                       | 0.035              | 4.4                 | 0.396           |
|      |              | 45-49             | 115.5                      | 0.024              | 8.3                 | 0.132           |
|      |              | 50-54             | 168.0                      | 0.023              | 14.1                | 0.132           |
|      |              | 55-59             | 216.4                      | 0.023              | 21.5                | 0.143           |
|      |              | 60-64             | 297.6                      | 0.020              | 31.0                | 0.143           |
|      |              | 65-69             | 448.8                      | 0.019              | 45.3                | 0.218           |
|      |              | 70-74             | 625.7                      | 0.035              | 64.0                | 0.218           |

|        |           |       |        |       |       |       |
|--------|-----------|-------|--------|-------|-------|-------|
|        |           | 75-79 | 733.8  | 0.058 | 79.7  | 0.294 |
|        |           | 80-84 | 788.9  | 0.083 | 87.6  | 0.294 |
|        |           | 85-89 | 1013.0 | 0.168 | 82.2  | 0.534 |
|        |           | 90-94 | 1645.2 | 0.399 | 57.6  | 0.534 |
|        |           | 95+   | 2760.7 | 0.803 | 36.8  | 0.534 |
| Female | Māori     | 0-4   | 0.0    | 0.000 | 0.0   | 0.431 |
|        |           | 5-9   | 0.0    | 0.000 | 0.0   | 0.431 |
|        |           | 10-14 | 0.0    | 0.000 | 0.0   | 0.431 |
|        |           | 15-19 | 0.0    | 0.000 | 0.0   | 0.431 |
|        |           | 20-24 | 0.0    | 0.000 | 0.0   | 0.431 |
|        |           | 25-29 | 0.8    | 0.333 | 0.0   | 0.431 |
|        |           | 30-34 | 4.2    | 1.476 | 0.0   | 0.431 |
|        |           | 35-39 | 15.1   | 1.897 | 0.1   | 0.431 |
|        |           | 40-44 | 75.9   | 1.017 | 0.6   | 0.431 |
|        |           | 45-49 | 163.9  | 0.126 | 4.2   | 0.137 |
|        |           | 50-54 | 226.0  | 0.029 | 12.5  | 0.137 |
|        |           | 55-59 | 274.1  | 0.027 | 22.4  | 0.130 |
|        |           | 60-64 | 353.9  | 0.030 | 33.7  | 0.130 |
|        |           | 65-69 | 463.0  | 0.034 | 47.0  | 0.164 |
|        |           | 70-74 | 586.2  | 0.042 | 61.9  | 0.164 |
|        |           | 75-79 | 721.5  | 0.055 | 76.6  | 0.258 |
|        |           | 80-84 | 1041.1 | 0.096 | 88.4  | 0.258 |
|        |           | 85-89 | 1650.4 | 0.229 | 87.5  | 0.559 |
|        |           | 90-94 | 2168.2 | 0.481 | 60.5  | 0.559 |
| 95+    | 2670.8    | 0.770 | 37.1   | 0.559 |       |       |
| Male   | non-Māori | 0-4   | 0.0    | 0.004 | 0.0   | 0.373 |
|        |           | 5-9   | 0.0    | 0.028 | 0.0   | 0.373 |
|        |           | 10-14 | 0.0    | 0.043 | 0.0   | 0.373 |
|        |           | 15-19 | 0.0    | 0.044 | 0.0   | 0.373 |
|        |           | 20-24 | 0.0    | 0.050 | 0.0   | 0.373 |
|        |           | 25-29 | 5.1    | 0.051 | 0.3   | 0.373 |
|        |           | 30-34 | 5.1    | 0.028 | 0.5   | 0.373 |
|        |           | 35-39 | 19.9   | 0.012 | 1.0   | 0.373 |
|        |           | 40-44 | 44.5   | 0.012 | 2.5   | 0.373 |
|        |           | 45-49 | 72.9   | 0.014 | 5.1   | 0.132 |
|        |           | 50-54 | 116.6  | 0.012 | 9.3   | 0.132 |
|        |           | 55-59 | 188.1  | 0.013 | 15.9  | 0.122 |
|        |           | 60-64 | 288.9  | 0.015 | 26.0  | 0.122 |
|        |           | 65-69 | 447.7  | 0.017 | 41.0  | 0.150 |
|        |           | 70-74 | 656.4  | 0.020 | 62.5  | 0.150 |
|        |           | 75-79 | 921.0  | 0.029 | 90.1  | 0.158 |
|        |           | 80-84 | 1255.7 | 0.048 | 120.5 | 0.158 |
|        |           | 85-89 | 1589.6 | 0.097 | 142.8 | 0.166 |
|        |           | 90-94 | 1876.4 | 0.219 | 127.9 | 0.166 |
| 95+    | 2773.8    | 0.472 | 73.9   | 0.166 |       |       |
| Female | non-Māori | 0-4   | 0.0    | 0.000 | 0.0   | 0.415 |
|        |           | 5-9   | 0.0    | 0.000 | 0.0   | 0.415 |
|        |           | 10-14 | 0.0    | 0.000 | 0.0   | 0.415 |
|        |           | 15-19 | 0.0    | 0.002 | 0.0   | 0.415 |
|        |           | 20-24 | 0.0    | 0.136 | 0.0   | 0.415 |
|        |           | 25-29 | 3.4    | 0.354 | 0.1   | 0.415 |
|        |           | 30-34 | 10.9   | 0.172 | 0.2   | 0.415 |
|        |           | 35-39 | 23.4   | 0.039 | 0.9   | 0.415 |
|        |           | 40-44 | 39.1   | 0.024 | 2.3   | 0.415 |
|        |           | 45-49 | 57.6   | 0.019 | 4.3   | 0.180 |
|        |           | 50-54 | 78.8   | 0.015 | 7.2   | 0.180 |
| 55-59  | 111.4     | 0.009 | 11.3   | 0.166 |       |       |



|       |        |       |       |       |
|-------|--------|-------|-------|-------|
| 60-64 | 182.0  | 0.011 | 17.7  | 0.166 |
| 65-69 | 299.4  | 0.017 | 27.6  | 0.164 |
| 70-74 | 483.1  | 0.024 | 42.7  | 0.164 |
| 75-79 | 775.5  | 0.033 | 64.8  | 0.180 |
| 80-84 | 1223.1 | 0.054 | 94.2  | 0.180 |
| 85-89 | 1739.5 | 0.080 | 116.5 | 0.242 |
| 90-94 | 2120.5 | 0.124 | 124.7 | 0.242 |
| 95+   | 2777.6 | 0.182 | 109.2 | 0.242 |

Table S5. Lung cancer input parameters

| Sex    | Ethnic group | Age group (years) | Incidence rate per 100,000 | Case-fatality rate | Remission rate | Prevalence per 1000 | Disability rate |
|--------|--------------|-------------------|----------------------------|--------------------|----------------|---------------------|-----------------|
| Male   | Māori        | 0-4               | 0.0                        | 0.00               | 0.000          | 0.0                 | 0.323           |
|        |              | 5-9               | 0.0                        | 0.00               | 0.000          | 0.0                 | 0.323           |
|        |              | 10-14             | 0.0                        | 0.00               | 0.000          | 0.0                 | 0.323           |
|        |              | 15-19             | 0.0                        | 0.00               | 0.000          | 0.0                 | 0.323           |
|        |              | 20-24             | 0.1                        | 0.00               | 0.000          | 0.0                 | 0.323           |
|        |              | 25-29             | 0.5                        | 0.03               | 0.005          | 0.0                 | 0.323           |
|        |              | 30-34             | 1.3                        | 0.14               | 0.023          | 0.0                 | 0.323           |
|        |              | 35-39             | 3.4                        | 0.30               | 0.046          | 0.1                 | 0.323           |
|        |              | 40-44             | 7.9                        | 0.29               | 0.063          | 0.1                 | 0.323           |
|        |              | 45-49             | 21.8                       | 0.27               | 0.065          | 0.4                 | 0.323           |
|        |              | 50-54             | 56.5                       | 0.51               | 0.058          | 0.9                 | 0.323           |
|        |              | 55-59             | 132.3                      | 0.79               | 0.055          | 1.3                 | 0.323           |
|        |              | 60-64             | 268.6                      | 0.80               | 0.048          | 2.7                 | 0.323           |
|        |              | 65-69             | 378.4                      | 0.83               | 0.052          | 4.1                 | 0.281           |
|        |              | 70-74             | 447.6                      | 0.95               | 0.056          | 4.5                 | 0.281           |
|        |              | 75-79             | 504.9                      | 1.31               | 0.052          | 3.9                 | 0.281           |
|        |              | 80-84             | 552.0                      | 1.67               | 0.046          | 3.2                 | 0.281           |
|        |              | 85-89             | 545.2                      | 1.59               | 0.044          | 3.4                 | 0.281           |
|        |              | 90-94             | 469.1                      | 1.62               | 0.043          | 2.9                 | 0.281           |
| 95+    | 404.5        | 1.77              | 0.043                      | 2.3                | 0.281          |                     |                 |
| Female | Māori        | 0-4               | 0.0                        | 0.00               | 0.000          | 0.0                 | 0.396           |
|        |              | 5-9               | 0.0                        | 0.00               | 0.000          | 0.0                 | 0.396           |
|        |              | 10-14             | 0.0                        | 0.00               | 0.000          | 0.0                 | 0.396           |
|        |              | 15-19             | 0.0                        | 0.00               | 0.000          | 0.0                 | 0.396           |
|        |              | 20-24             | 0.3                        | 0.00               | 0.000          | 0.0                 | 0.396           |
|        |              | 25-29             | 1.5                        | 0.10               | 0.010          | 0.0                 | 0.396           |
|        |              | 30-34             | 3.9                        | 0.53               | 0.061          | 0.1                 | 0.396           |
|        |              | 35-39             | 8.2                        | 1.14               | 0.155          | 0.1                 | 0.396           |
|        |              | 40-44             | 15.3                       | 1.00               | 0.186          | 0.1                 | 0.396           |
|        |              | 45-49             | 42.1                       | 0.57               | 0.138          | 0.4                 | 0.396           |
|        |              | 50-54             | 105.0                      | 0.56               | 0.092          | 1.3                 | 0.396           |
|        |              | 55-59             | 208.8                      | 0.63               | 0.080          | 2.6                 | 0.396           |
|        |              | 60-64             | 353.0                      | 0.85               | 0.069          | 3.7                 | 0.396           |
|        |              | 65-69             | 443.6                      | 0.99               | 0.067          | 4.1                 | 0.313           |
|        |              | 70-74             | 502.0                      | 1.02               | 0.060          | 4.5                 | 0.313           |
|        |              | 75-79             | 549.3                      | 0.98               | 0.045          | 5.2                 | 0.313           |
|        |              | 80-84             | 557.2                      | 0.99               | 0.037          | 5.7                 | 0.313           |
|        |              | 85-89             | 502.3                      | 1.23               | 0.035          | 4.2                 | 0.313           |
|        |              | 90-94             | 432.5                      | 1.43               | 0.034          | 3.1                 | 0.313           |
| 95+    | 378.7        | 1.64              | 0.034                      | 2.4                | 0.313          |                     |                 |
| Male   | non-Māori    | 0-4               | 0.0                        | 0.00               | 0.000          | 0.0                 | 0.358           |
|        |              | 5-9               | 0.0                        | 0.00               | 0.000          | 0.0                 | 0.358           |

|        |           |       |       |      |       |     |       |
|--------|-----------|-------|-------|------|-------|-----|-------|
|        |           | 10-14 | 0.0   | 0.00 | 0.000 | 0.0 | 0.358 |
|        |           | 15-19 | 0.0   | 0.00 | 0.000 | 0.0 | 0.358 |
|        |           | 20-24 | 0.1   | 0.00 | 0.000 | 0.0 | 0.358 |
|        |           | 25-29 | 0.3   | 0.07 | 0.014 | 0.0 | 0.358 |
|        |           | 30-34 | 0.6   | 0.29 | 0.062 | 0.0 | 0.358 |
|        |           | 35-39 | 1.6   | 0.33 | 0.080 | 0.0 | 0.358 |
|        |           | 40-44 | 3.6   | 0.35 | 0.082 | 0.1 | 0.358 |
|        |           | 45-49 | 9.0   | 0.47 | 0.078 | 0.1 | 0.331 |
|        |           | 50-54 | 20.9  | 0.55 | 0.066 | 0.3 | 0.331 |
|        |           | 55-59 | 43.6  | 0.55 | 0.068 | 0.6 | 0.338 |
|        |           | 60-64 | 85.6  | 0.61 | 0.066 | 1.1 | 0.338 |
|        |           | 65-69 | 135.1 | 0.71 | 0.073 | 1.6 | 0.297 |
|        |           | 70-74 | 199.0 | 0.83 | 0.082 | 2.1 | 0.297 |
|        |           | 75-79 | 268.5 | 1.11 | 0.091 | 2.3 | 0.273 |
|        |           | 80-84 | 309.2 | 1.55 | 0.105 | 1.9 | 0.273 |
|        |           | 85-89 | 298.5 | 1.96 | 0.112 | 1.5 | 0.378 |
|        |           | 90-94 | 275.5 | 2.23 | 0.105 | 1.2 | 0.378 |
|        |           | 95+   | 245.2 | 2.46 | 0.100 | 1.0 | 0.378 |
| Female | non-Māori | 0-4   | 0.0   | 0.00 | 0.000 | 0.0 | 0.353 |
|        |           | 5-9   | 0.0   | 0.00 | 0.000 | 0.0 | 0.353 |
|        |           | 10-14 | 0.0   | 0.00 | 0.000 | 0.0 | 0.353 |
|        |           | 15-19 | 0.0   | 0.00 | 0.000 | 0.0 | 0.353 |
|        |           | 20-24 | 0.2   | 0.00 | 0.000 | 0.0 | 0.353 |
|        |           | 25-29 | 0.6   | 0.03 | 0.019 | 0.0 | 0.353 |
|        |           | 30-34 | 1.3   | 0.12 | 0.094 | 0.1 | 0.353 |
|        |           | 35-39 | 2.7   | 0.15 | 0.179 | 0.1 | 0.353 |
|        |           | 40-44 | 5.9   | 0.26 | 0.149 | 0.1 | 0.353 |
|        |           | 45-49 | 11.9  | 0.39 | 0.079 | 0.2 | 0.355 |
|        |           | 50-54 | 22.9  | 0.44 | 0.076 | 0.4 | 0.355 |
|        |           | 55-59 | 42.6  | 0.50 | 0.079 | 0.6 | 0.367 |
|        |           | 60-64 | 73.9  | 0.55 | 0.067 | 1.0 | 0.367 |
|        |           | 65-69 | 106.9 | 0.68 | 0.063 | 1.4 | 0.305 |
|        |           | 70-74 | 139.5 | 0.80 | 0.062 | 1.6 | 0.305 |
|        |           | 75-79 | 162.6 | 0.97 | 0.058 | 1.6 | 0.290 |
|        |           | 80-84 | 171.7 | 1.14 | 0.055 | 1.4 | 0.290 |
|        |           | 85-89 | 169.9 | 1.13 | 0.053 | 1.5 | 0.122 |
|        |           | 90-94 | 147.7 | 1.19 | 0.052 | 1.2 | 0.122 |
|        |           | 95+   | 128.4 | 1.36 | 0.052 | 1.0 | 0.122 |

Table S6. Head and neck cancer input parameters

| Sex  | Ethnic group | Age group (years) | Incidence rate per 100,000 | Case-fatality rate | Remission rate | Prevalence per 1000 | Disability rate |
|------|--------------|-------------------|----------------------------|--------------------|----------------|---------------------|-----------------|
| Male | Māori        | 0-4               | 0.0                        | 0.000              | 0.000          | 0.0                 | 0.319           |
|      |              | 5-9               | 0.0                        | 0.000              | 0.000          | 0.0                 | 0.319           |
|      |              | 10-14             | 0.0                        | 0.000              | 0.000          | 0.0                 | 0.319           |
|      |              | 15-19             | 0.3                        | 0.000              | 0.000          | 0.0                 | 0.319           |
|      |              | 20-24             | 0.9                        | 0.001              | 0.000          | 0.0                 | 0.319           |
|      |              | 25-29             | 1.8                        | 0.010              | 0.031          | 0.1                 | 0.319           |
|      |              | 30-34             | 3.1                        | 0.033              | 0.132          | 0.1                 | 0.319           |
|      |              | 35-39             | 5.1                        | 0.033              | 0.145          | 0.2                 | 0.319           |
|      |              | 40-44             | 8.4                        | 0.035              | 0.084          | 0.3                 | 0.319           |
|      |              | 45-49             | 13.4                       | 0.054              | 0.061          | 0.6                 | 0.319           |
|      |              | 50-54             | 20.1                       | 0.075              | 0.097          | 0.9                 | 0.319           |
|      |              | 55-59             | 28.9                       | 0.097              | 0.111          | 1.1                 | 0.319           |

|        |           |       |           |       |       |       |       |
|--------|-----------|-------|-----------|-------|-------|-------|-------|
|        |           | 60-64 | 37.9      | 0.144 | 0.086 | 1.4   | 0.319 |
|        |           | 65-69 | 42.8      | 0.159 | 0.064 | 1.7   | 0.270 |
|        |           | 70-74 | 44.7      | 0.181 | 0.052 | 1.9   | 0.270 |
|        |           | 75-79 | 44.1      | 0.192 | 0.055 | 1.8   | 0.270 |
|        |           | 80-84 | 45.4      | 0.177 | 0.065 | 1.8   | 0.270 |
|        |           | 85-89 | 56.9      | 0.208 | 0.059 | 2.0   | 0.270 |
|        |           | 90-94 | 73.4      | 0.282 | 0.056 | 2.1   | 0.270 |
|        |           | 95+   | 88.3      | 0.344 | 0.060 | 2.2   | 0.270 |
| Female | Māori     | 0-4   | 0.0       | 0.000 | 0.000 | 0.0   | 0.388 |
|        |           | 5-9   | 0.0       | 0.000 | 0.000 | 0.0   | 0.388 |
|        |           | 10-14 | 0.0       | 0.000 | 0.000 | 0.0   | 0.388 |
|        |           | 15-19 | 0.1       | 0.000 | 0.000 | 0.0   | 0.388 |
|        |           | 20-24 | 0.3       | 0.001 | 0.000 | 0.0   | 0.388 |
|        |           | 25-29 | 0.9       | 0.013 | 0.092 | 0.0   | 0.388 |
|        |           | 30-34 | 2.5       | 0.047 | 0.395 | 0.1   | 0.388 |
|        |           | 35-39 | 3.8       | 0.047 | 0.452 | 0.1   | 0.388 |
|        |           | 40-44 | 5.1       | 0.046 | 0.263 | 0.1   | 0.388 |
|        |           | 45-49 | 6.9       | 0.073 | 0.142 | 0.2   | 0.388 |
|        |           | 50-54 | 9.1       | 0.105 | 0.164 | 0.3   | 0.388 |
|        |           | 55-59 | 12.2      | 0.142 | 0.151 | 0.4   | 0.388 |
|        |           | 60-64 | 16.1      | 0.209 | 0.104 | 0.5   | 0.388 |
|        |           | 65-69 | 19.0      | 0.235 | 0.086 | 0.5   | 0.196 |
|        |           | 70-74 | 21.9      | 0.283 | 0.085 | 0.6   | 0.196 |
|        |           | 75-79 | 24.1      | 0.312 | 0.123 | 0.6   | 0.196 |
|        |           | 80-84 | 27.3      | 0.283 | 0.178 | 0.6   | 0.196 |
|        |           | 85-89 | 35.7      | 0.322 | 0.169 | 0.7   | 0.196 |
|        |           | 90-94 | 46.5      | 0.473 | 0.152 | 0.7   | 0.196 |
|        |           | Male  | non-Māori | 95+   | 58.9  | 0.695 | 0.130 |
| 0-4    | 0.0       |       |           | 0.000 | 0.000 | 0.0   | 0.280 |
| 5-9    | 0.0       |       |           | 0.000 | 0.000 | 0.0   | 0.280 |
| 10-14  | 0.0       |       |           | 0.000 | 0.000 | 0.0   | 0.280 |
| 15-19  | 0.0       |       |           | 0.000 | 0.000 | 0.0   | 0.280 |
| 20-24  | 0.7       |       |           | 0.001 | 0.000 | 0.0   | 0.280 |
| 25-29  | 1.1       |       |           | 0.009 | 0.012 | 0.1   | 0.280 |
| 30-34  | 1.8       |       |           | 0.026 | 0.051 | 0.1   | 0.280 |
| 35-39  | 2.9       |       |           | 0.028 | 0.063 | 0.2   | 0.280 |
| 40-44  | 4.9       |       |           | 0.030 | 0.037 | 0.3   | 0.280 |
| 45-49  | 8.1       |       |           | 0.048 | 0.019 | 0.5   | 0.256 |
| 50-54  | 12.9      |       |           | 0.067 | 0.040 | 0.7   | 0.256 |
| 55-59  | 19.6      |       |           | 0.083 | 0.065 | 1.0   | 0.283 |
| 60-64  | 27.8      |       |           | 0.115 | 0.054 | 1.3   | 0.283 |
| 65-69  | 33.3      |       |           | 0.129 | 0.052 | 1.6   | 0.225 |
| 70-74  | 37.4      |       |           | 0.153 | 0.057 | 1.7   | 0.225 |
| 75-79  | 40.2      |       |           | 0.165 | 0.080 | 1.7   | 0.182 |
| 80-84  | 44.4      |       |           | 0.152 | 0.108 | 1.7   | 0.182 |
| 85-89  | 56.5      |       |           | 0.178 | 0.098 | 1.9   | 0.112 |
| 90-94  | 71.2      |       |           | 0.249 | 0.101 | 2.0   | 0.112 |
| Female | non-Māori | 95+   | 81.3      | 0.332 | 0.115 | 2.0   | 0.112 |
|        |           | 0-4   | 0.0       | 0.000 | 0.000 | 0.0   | 0.494 |
|        |           | 5-9   | 0.0       | 0.000 | 0.000 | 0.0   | 0.494 |
|        |           | 10-14 | 0.0       | 0.000 | 0.000 | 0.0   | 0.494 |
|        |           | 15-19 | 0.0       | 0.000 | 0.000 | 0.0   | 0.494 |
|        |           | 20-24 | 0.3       | 0.000 | 0.000 | 0.0   | 0.494 |
|        |           | 25-29 | 0.6       | 0.010 | 0.051 | 0.0   | 0.494 |
|        |           | 30-34 | 1.4       | 0.040 | 0.216 | 0.0   | 0.494 |
|        |           | 35-39 | 2.1       | 0.043 | 0.245 | 0.1   | 0.494 |
|        |           | 40-44 | 3.2       | 0.038 | 0.174 | 0.1   | 0.494 |

|       |      |       |       |     |       |
|-------|------|-------|-------|-----|-------|
| 45-49 | 4.6  | 0.050 | 0.136 | 0.2 | 0.386 |
| 50-54 | 6.3  | 0.070 | 0.140 | 0.2 | 0.386 |
| 55-59 | 9.1  | 0.089 | 0.138 | 0.3 | 0.312 |
| 60-64 | 12.6 | 0.107 | 0.136 | 0.4 | 0.312 |
| 65-69 | 15.7 | 0.137 | 0.137 | 0.5 | 0.263 |
| 70-74 | 19.1 | 0.177 | 0.150 | 0.6 | 0.263 |
| 75-79 | 21.8 | 0.221 | 0.189 | 0.6 | 0.297 |
| 80-84 | 25.4 | 0.258 | 0.237 | 0.5 | 0.297 |
| 85-89 | 34.8 | 0.291 | 0.256 | 0.6 | 0.165 |
| 90-94 | 44.4 | 0.341 | 0.259 | 0.7 | 0.165 |
| 95+   | 49.3 | 0.389 | 0.264 | 0.8 | 0.165 |

Table S7. Esophageal cancer input parameters

| Sex    | Ethnic group | Age group (years) | Incidence rate per 100,000 | Case-fatality rate | Remission rate | Prevalence per 1000 | Disability rate |
|--------|--------------|-------------------|----------------------------|--------------------|----------------|---------------------|-----------------|
| Male   | Māori        | 0-4               | 0.0                        | 0.00               | 0.000          | 0.000               | 0.283           |
|        |              | 5-9               | 0.0                        | 0.00               | 0.000          | 0.000               | 0.283           |
|        |              | 10-14             | 0.0                        | 0.00               | 0.000          | 0.000               | 0.283           |
|        |              | 15-19             | 0.0                        | 0.00               | 0.000          | 0.000               | 0.283           |
|        |              | 20-24             | 0.0                        | 0.00               | 0.000          | 0.000               | 0.283           |
|        |              | 25-29             | 0.0                        | 0.08               | 0.009          | 0.000               | 0.283           |
|        |              | 30-34             | 0.0                        | 0.33               | 0.032          | 0.001               | 0.283           |
|        |              | 35-39             | 0.5                        | 0.38               | 0.023          | 0.007               | 0.283           |
|        |              | 40-44             | 1.3                        | 0.43               | 0.048          | 0.022               | 0.283           |
|        |              | 45-49             | 2.9                        | 0.60               | 0.129          | 0.036               | 0.283           |
|        |              | 50-54             | 6.9                        | 0.63               | 0.166          | 0.072               | 0.283           |
|        |              | 55-59             | 15.7                       | 0.53               | 0.114          | 0.195               | 0.283           |
|        |              | 60-64             | 27.9                       | 0.76               | 0.096          | 0.304               | 0.283           |
|        |              | 65-69             | 39.4                       | 0.73               | 0.075          | 0.438               | 0.283           |
|        |              | 70-74             | 50.9                       | 0.69               | 0.042          | 0.652               | 0.283           |
|        |              | 75-79             | 62.3                       | 0.82               | 0.021          | 0.736               | 0.283           |
|        |              | 80-84             | 70.9                       | 0.97               | 0.017          | 0.728               | 0.283           |
|        |              | 85-89             | 72.6                       | 1.22               | 0.016          | 0.619               | 0.283           |
|        |              | 90-94             | 64.1                       | 1.58               | 0.016          | 0.430               | 0.283           |
|        |              | 95+               | 51.9                       | 1.78               | 0.016          | 0.282               | 0.283           |
| Female | Māori        | 0-4               | 0.0                        | 0.00               | 0.000          | 0.000               | 0.271           |
|        |              | 5-9               | 0.0                        | 0.00               | 0.000          | 0.000               | 0.271           |
|        |              | 10-14             | 0.0                        | 0.00               | 0.000          | 0.000               | 0.271           |
|        |              | 15-19             | 0.0                        | 0.00               | 0.000          | 0.000               | 0.271           |
|        |              | 20-24             | 0.0                        | 0.00               | 0.000          | 0.000               | 0.271           |
|        |              | 25-29             | 0.0                        | 0.06               | 0.006          | 0.000               | 0.271           |
|        |              | 30-34             | 0.0                        | 0.24               | 0.021          | 0.000               | 0.271           |
|        |              | 35-39             | 0.2                        | 0.26               | 0.020          | 0.003               | 0.271           |
|        |              | 40-44             | 0.4                        | 0.28               | 0.017          | 0.010               | 0.271           |
|        |              | 45-49             | 0.9                        | 0.40               | 0.026          | 0.017               | 0.271           |
|        |              | 50-54             | 1.8                        | 0.45               | 0.030          | 0.029               | 0.271           |
|        |              | 55-59             | 4.3                        | 0.41               | 0.020          | 0.072               | 0.271           |
|        |              | 60-64             | 8.7                        | 0.51               | 0.019          | 0.138               | 0.271           |
|        |              | 65-69             | 13.0                       | 0.50               | 0.017          | 0.215               | 0.271           |
|        |              | 70-74             | 17.8                       | 0.50               | 0.012          | 0.314               | 0.271           |
|        |              | 75-79             | 23.7                       | 0.58               | 0.008          | 0.383               | 0.271           |
|        |              | 80-84             | 28.0                       | 0.66               | 0.008          | 0.416               | 0.271           |
|        |              | 85-89             | 27.0                       | 0.77               | 0.008          | 0.371               | 0.271           |
|        |              | 90-94             | 22.1                       | 0.93               | 0.008          | 0.262               | 0.271           |

|        |           |       |       |       |       |       |       |
|--------|-----------|-------|-------|-------|-------|-------|-------|
| Male   | non-Māori | 95+   | 17.4  | 1.07  | 0.008 | 0.162 | 0.271 |
|        |           | 0-4   | 0.0   | 0.00  | 0.000 | 0.000 | 0.530 |
|        |           | 5-9   | 0.0   | 0.00  | 0.000 | 0.000 | 0.530 |
|        |           | 10-14 | 0.0   | 0.00  | 0.000 | 0.000 | 0.530 |
|        |           | 15-19 | 0.0   | 0.00  | 0.000 | 0.000 | 0.530 |
|        |           | 20-24 | 0.0   | 0.00  | 0.000 | 0.000 | 0.530 |
|        |           | 25-29 | 0.0   | 0.11  | 0.024 | 0.000 | 0.530 |
|        |           | 30-34 | 0.1   | 0.46  | 0.094 | 0.000 | 0.530 |
|        |           | 35-39 | 0.5   | 0.50  | 0.084 | 0.006 | 0.530 |
|        |           | 40-44 | 1.3   | 0.55  | 0.140 | 0.017 | 0.530 |
|        |           | 45-49 | 2.7   | 0.84  | 0.250 | 0.023 | 0.530 |
|        |           | 50-54 | 5.6   | 0.94  | 0.237 | 0.042 | 0.530 |
|        |           | 55-59 | 11.8  | 0.76  | 0.128 | 0.113 | 0.530 |
|        |           | 60-64 | 21.4  | 0.97  | 0.106 | 0.187 | 0.530 |
|        |           | 65-69 | 31.8  | 0.96  | 0.107 | 0.275 | 0.295 |
|        |           | 70-74 | 43.5  | 0.97  | 0.092 | 0.392 | 0.295 |
|        |           | 75-79 | 56.2  | 1.15  | 0.079 | 0.450 | 0.295 |
|        |           | 80-84 | 65.8  | 1.31  | 0.075 | 0.473 | 0.295 |
|        |           | 85-89 | 65.9  | 1.55  | 0.072 | 0.420 | 0.295 |
|        |           | 90-94 | 55.6  | 1.82  | 0.069 | 0.310 | 0.295 |
| Female | non-Māori | 95+   | 44.3  | 1.98  | 0.071 | 0.210 | 0.295 |
|        |           | 0-4   | 0.0   | 0.00  | 0.000 | 0.000 | 0.367 |
|        |           | 5-9   | 0.0   | 0.00  | 0.000 | 0.000 | 0.367 |
|        |           | 10-14 | 0.0   | 0.00  | 0.000 | 0.000 | 0.367 |
|        |           | 15-19 | 0.0   | 0.00  | 0.000 | 0.000 | 0.367 |
|        |           | 20-24 | 0.0   | 0.00  | 0.000 | 0.000 | 0.367 |
|        |           | 25-29 | 0.0   | 0.09  | 0.025 | 0.000 | 0.367 |
|        |           | 30-34 | 0.0   | 0.39  | 0.099 | 0.000 | 0.367 |
|        |           | 35-39 | 0.3   | 0.42  | 0.082 | 0.003 | 0.367 |
|        |           | 40-44 | 0.6   | 0.42  | 0.068 | 0.010 | 0.367 |
|        |           | 45-49 | 1.0   | 0.57  | 0.082 | 0.014 | 0.367 |
|        |           | 50-54 | 1.9   | 0.61  | 0.063 | 0.023 | 0.367 |
|        |           | 55-59 | 4.0   | 0.50  | 0.039 | 0.057 | 0.367 |
|        |           | 60-64 | 7.8   | 0.62  | 0.040 | 0.103 | 0.367 |
|        |           | 65-69 | 11.9  | 0.64  | 0.043 | 0.155 | 0.279 |
|        |           | 70-74 | 17.1  | 0.68  | 0.045 | 0.221 | 0.279 |
|        |           | 75-79 | 24.7  | 0.85  | 0.052 | 0.264 | 0.279 |
|        |           | 80-84 | 31.8  | 1.04  | 0.058 | 0.289 | 0.279 |
|        |           | 85-89 | 33.0  | 1.25  | 0.061 | 0.261 | 0.279 |
|        |           | 90-94 | 29.1  | 1.53  | 0.058 | 0.194 | 0.279 |
| 95+    | 24.1      | 1.73  | 0.058 | 0.133 | 0.279 |       |       |

Table S8. Stomach cancer input parameters

| Sex  | Ethnic group | Age group (years) | Incidence rate per 100,000 | Case-fatality rate | Remission rate | Prevalence per 1000 | Disability rate |
|------|--------------|-------------------|----------------------------|--------------------|----------------|---------------------|-----------------|
| Male | Māori        | 0-4               | 0.0                        | 0.000              | 0.000          | 0.0                 | 0.262           |
|      |              | 5-9               | 0.0                        | 0.000              | 0.000          | 0.0                 | 0.262           |
|      |              | 10-14             | 0.0                        | 0.000              | 0.000          | 0.0                 | 0.262           |
|      |              | 15-19             | 0.0                        | 0.000              | 0.000          | 0.1                 | 0.262           |
|      |              | 20-24             | 0.7                        | 0.000              | 0.000          | 0.1                 | 0.262           |
|      |              | 25-29             | 2.0                        | 0.025              | 0.086          | 0.2                 | 0.262           |
|      |              | 30-34             | 3.4                        | 0.126              | 0.347          | 0.1                 | 0.262           |
|      |              | 35-39             | 6.4                        | 0.267              | 0.305          | 0.1                 | 0.262           |
|      |              | 40-44             | 11.5                       | 0.477              | 0.176          | 0.2                 | 0.262           |

|        |           |       |       |       |       |       |       |
|--------|-----------|-------|-------|-------|-------|-------|-------|
|        |           | 45-49 | 17.6  | 0.529 | 0.146 | 0.2   | 0.262 |
|        |           | 50-54 | 24.6  | 0.410 | 0.153 | 0.4   | 0.262 |
|        |           | 55-59 | 37.3  | 0.528 | 0.189 | 0.5   | 0.262 |
|        |           | 60-64 | 60.1  | 0.828 | 0.162 | 0.6   | 0.262 |
|        |           | 65-69 | 83.9  | 0.802 | 0.119 | 0.8   | 0.326 |
|        |           | 70-74 | 103.7 | 0.665 | 0.099 | 1.3   | 0.326 |
|        |           | 75-79 | 139.4 | 0.553 | 0.082 | 1.9   | 0.326 |
|        |           | 80-84 | 185.0 | 0.464 | 0.064 | 3.1   | 0.326 |
|        |           | 85-89 | 209.0 | 0.573 | 0.066 | 3.4   | 0.326 |
|        |           | 90-94 | 250.4 | 0.777 | 0.060 | 3.1   | 0.326 |
|        |           | 95+   | 280.6 | 0.949 | 0.057 | 2.9   | 0.326 |
| Female | Māori     | 0-4   | 0.0   | 0.000 | 0.000 | 0.0   | 0.296 |
|        |           | 5-9   | 0.0   | 0.000 | 0.000 | 0.0   | 0.296 |
|        |           | 10-14 | 0.0   | 0.000 | 0.000 | 0.0   | 0.296 |
|        |           | 15-19 | 0.0   | 0.000 | 0.000 | 0.1   | 0.296 |
|        |           | 20-24 | 0.2   | 0.000 | 0.000 | 0.1   | 0.296 |
|        |           | 25-29 | 0.9   | 0.111 | 0.011 | 0.1   | 0.296 |
|        |           | 30-34 | 4.8   | 0.484 | 0.047 | 0.1   | 0.296 |
|        |           | 35-39 | 8.2   | 0.605 | 0.058 | 0.1   | 0.296 |
|        |           | 40-44 | 11.3  | 0.500 | 0.075 | 0.2   | 0.296 |
|        |           | 45-49 | 15.7  | 0.406 | 0.079 | 0.3   | 0.296 |
|        |           | 50-54 | 20.0  | 0.424 | 0.084 | 0.4   | 0.296 |
|        |           | 55-59 | 24.1  | 0.496 | 0.142 | 0.4   | 0.296 |
|        |           | 60-64 | 35.8  | 0.416 | 0.123 | 0.5   | 0.296 |
|        |           | 65-69 | 48.6  | 0.307 | 0.100 | 1.0   | 0.281 |
|        |           | 70-74 | 61.3  | 0.403 | 0.097 | 1.3   | 0.281 |
|        |           | 75-79 | 61.2  | 0.518 | 0.090 | 1.1   | 0.281 |
|        |           | 80-84 | 69.5  | 0.448 | 0.069 | 1.1   | 0.281 |
|        |           | 85-89 | 123.1 | 0.404 | 0.050 | 2.2   | 0.281 |
|        |           | 90-94 | 148.8 | 0.523 | 0.046 | 2.7   | 0.281 |
|        |           |       |       | 95+   | 163.8 | 0.720 | 0.044 |
| Male   | non-Māori | 0-4   | 0.0   | 0.000 | 0.000 | 0.0   | 0.304 |
|        |           | 5-9   | 0.0   | 0.000 | 0.000 | 0.0   | 0.304 |
|        |           | 10-14 | 0.0   | 0.000 | 0.000 | 0.0   | 0.304 |
|        |           | 15-19 | 0.0   | 0.000 | 0.000 | 0.0   | 0.304 |
|        |           | 20-24 | 0.2   | 0.000 | 0.000 | 0.0   | 0.304 |
|        |           | 25-29 | 0.3   | 0.030 | 0.014 | 0.0   | 0.304 |
|        |           | 30-34 | 0.7   | 0.136 | 0.065 | 0.0   | 0.304 |
|        |           | 35-39 | 1.4   | 0.213 | 0.102 | 0.0   | 0.304 |
|        |           | 40-44 | 2.5   | 0.266 | 0.138 | 0.1   | 0.304 |
|        |           | 45-49 | 4.6   | 0.286 | 0.156 | 0.1   | 0.300 |
|        |           | 50-54 | 8.5   | 0.298 | 0.163 | 0.2   | 0.300 |
|        |           | 55-59 | 15.6  | 0.391 | 0.210 | 0.2   | 0.359 |
|        |           | 60-64 | 26.4  | 0.500 | 0.254 | 0.3   | 0.359 |
|        |           | 65-69 | 36.5  | 0.491 | 0.243 | 0.5   | 0.342 |
|        |           | 70-74 | 52.4  | 0.561 | 0.223 | 0.6   | 0.342 |
|        |           | 75-79 | 71.3  | 0.665 | 0.192 | 0.8   | 0.249 |
|        |           | 80-84 | 87.4  | 0.660 | 0.147 | 1.0   | 0.249 |
|        |           | 85-89 | 102.4 | 0.652 | 0.133 | 1.3   | 0.143 |
|        |           | 90-94 | 114.0 | 0.683 | 0.131 | 1.4   | 0.143 |
|        |           |       |       | 95+   | 115.8 | 0.724 | 0.132 |
| Female | non-Māori | 0-4   | 0.0   | 0.000 | 0.000 | 0.0   | 0.153 |
|        |           | 5-9   | 0.0   | 0.000 | 0.000 | 0.0   | 0.153 |
|        |           | 10-14 | 0.0   | 0.000 | 0.000 | 0.0   | 0.153 |
|        |           | 15-19 | 0.0   | 0.000 | 0.000 | 0.0   | 0.153 |
|        |           | 20-24 | 0.5   | 0.000 | 0.000 | 0.0   | 0.153 |
|        |           | 25-29 | 0.3   | 0.032 | 0.019 | 0.0   | 0.153 |

|  |       |      |       |       |     |       |
|--|-------|------|-------|-------|-----|-------|
|  | 30-34 | 0.4  | 0.148 | 0.086 | 0.0 | 0.153 |
|  | 35-39 | 0.8  | 0.249 | 0.118 | 0.0 | 0.153 |
|  | 40-44 | 1.7  | 0.302 | 0.134 | 0.0 | 0.153 |
|  | 45-49 | 2.9  | 0.289 | 0.133 | 0.1 | 0.312 |
|  | 50-54 | 4.5  | 0.265 | 0.121 | 0.1 | 0.312 |
|  | 55-59 | 6.6  | 0.345 | 0.147 | 0.1 | 0.239 |
|  | 60-64 | 9.4  | 0.457 | 0.172 | 0.1 | 0.239 |
|  | 65-69 | 14.6 | 0.425 | 0.167 | 0.2 | 0.317 |
|  | 70-74 | 23.1 | 0.446 | 0.156 | 0.3 | 0.317 |
|  | 75-79 | 33.0 | 0.522 | 0.137 | 0.5 | 0.231 |
|  | 80-84 | 41.5 | 0.512 | 0.110 | 0.6 | 0.231 |
|  | 85-89 | 47.4 | 0.491 | 0.101 | 0.8 | 0.107 |
|  | 90-94 | 51.3 | 0.516 | 0.100 | 0.8 | 0.107 |
|  | 95+   | 51.4 | 0.561 | 0.101 | 0.8 | 0.107 |

Table S9. Liver cancer input parameters

| Sex    | Ethnic group | Age group (years) | Incidence rate per 100,000 | Case-fatality rate | Remission rate | Prevalence per 1000 | Disability rate |
|--------|--------------|-------------------|----------------------------|--------------------|----------------|---------------------|-----------------|
| Male   | Māori        | 0-4               | 0.0                        | 0.00               | 0.000          | 0.000               | 0.148           |
|        |              | 5-9               | 0.0                        | 0.00               | 0.000          | 0.000               | 0.148           |
|        |              | 10-14             | 0.0                        | 0.00               | 0.000          | 0.000               | 0.148           |
|        |              | 15-19             | 0.0                        | 0.00               | 0.000          | 0.005               | 0.148           |
|        |              | 20-24             | 0.7                        | 0.00               | 0.000          | 0.027               | 0.148           |
|        |              | 25-29             | 1.4                        | 0.03               | 0.031          | 0.072               | 0.148           |
|        |              | 30-34             | 2.9                        | 0.14               | 0.133          | 0.100               | 0.148           |
|        |              | 35-39             | 5.3                        | 0.17               | 0.150          | 0.131               | 0.148           |
|        |              | 40-44             | 9.8                        | 0.26               | 0.109          | 0.216               | 0.148           |
|        |              | 45-49             | 18.3                       | 0.47               | 0.087          | 0.298               | 0.148           |
|        |              | 50-54             | 32.4                       | 0.63               | 0.086          | 0.409               | 0.148           |
|        |              | 55-59             | 49.8                       | 0.62               | 0.086          | 0.628               | 0.148           |
|        |              | 60-64             | 59.4                       | 0.55               | 0.083          | 0.867               | 0.148           |
|        |              | 65-69             | 57.2                       | 0.54               | 0.086          | 0.931               | 0.138           |
|        |              | 70-74             | 52.6                       | 0.56               | 0.103          | 0.832               | 0.138           |
|        |              | 75-79             | 53.1                       | 0.67               | 0.097          | 0.727               | 0.138           |
|        |              | 80-84             | 54.2                       | 1.16               | 0.072          | 0.512               | 0.138           |
| 85-89  | 44.5         | 1.72              | 0.087                      | 0.263              | 0.138          |                     |                 |
| 90-94  | 23.7         | 1.18              | 0.117                      | 0.192              | 0.138          |                     |                 |
| 95+    | 13.3         | 0.48              | 0.141                      | 0.187              | 0.138          |                     |                 |
| Female | Māori        | 0-4               | 0.0                        | 0.00               | 0.000          | 0.000               | 0.183           |
|        |              | 5-9               | 0.0                        | 0.00               | 0.000          | 0.000               | 0.183           |
|        |              | 10-14             | 0.0                        | 0.00               | 0.000          | 0.000               | 0.183           |
|        |              | 15-19             | 0.0                        | 0.00               | 0.000          | 0.000               | 0.183           |
|        |              | 20-24             | 0.1                        | 0.00               | 0.000          | 0.003               | 0.183           |
|        |              | 25-29             | 0.6                        | 0.13               | 0.041          | 0.017               | 0.183           |
|        |              | 30-34             | 1.1                        | 0.54               | 0.174          | 0.018               | 0.183           |
|        |              | 35-39             | 1.8                        | 0.62               | 0.200          | 0.020               | 0.183           |
|        |              | 40-44             | 3.3                        | 0.51               | 0.150          | 0.041               | 0.183           |
|        |              | 45-49             | 4.2                        | 0.48               | 0.122          | 0.065               | 0.183           |
|        |              | 50-54             | 5.8                        | 0.49               | 0.122          | 0.085               | 0.183           |
|        |              | 55-59             | 10.4                       | 0.50               | 0.123          | 0.144               | 0.183           |
|        |              | 60-64             | 13.7                       | 0.67               | 0.129          | 0.172               | 0.183           |
|        |              | 65-69             | 18.3                       | 0.92               | 0.115          | 0.175               | 0.183           |
| 70-74  | 20.4         | 1.28              | 0.118                      | 0.152              | 0.183          |                     |                 |
| 75-79  | 19.5         | 1.31              | 0.102                      | 0.136              | 0.183          |                     |                 |

|        |           |       |      |      |       |       |       |
|--------|-----------|-------|------|------|-------|-------|-------|
|        |           | 80-84 | 18.3 | 0.98 | 0.050 | 0.171 | 0.183 |
|        |           | 85-89 | 16.1 | 0.89 | 0.039 | 0.177 | 0.183 |
|        |           | 90-94 | 10.3 | 0.77 | 0.038 | 0.140 | 0.183 |
|        |           | 95+   | 6.4  | 0.55 | 0.039 | 0.102 | 0.183 |
| Male   | non-Māori | 0-4   | 0.0  | 0.00 | 0.000 | 0.000 | 0.147 |
|        |           | 5-9   | 0.0  | 0.00 | 0.000 | 0.000 | 0.147 |
|        |           | 10-14 | 0.0  | 0.00 | 0.000 | 0.000 | 0.147 |
|        |           | 15-19 | 0.0  | 0.00 | 0.000 | 0.000 | 0.147 |
|        |           | 20-24 | 0.1  | 0.00 | 0.000 | 0.002 | 0.147 |
|        |           | 25-29 | 0.5  | 0.09 | 0.029 | 0.013 | 0.147 |
|        |           | 30-34 | 0.9  | 0.42 | 0.126 | 0.017 | 0.147 |
|        |           | 35-39 | 1.4  | 0.53 | 0.146 | 0.019 | 0.147 |
|        |           | 40-44 | 2.4  | 0.42 | 0.103 | 0.036 | 0.147 |
|        |           | 45-49 | 4.2  | 0.44 | 0.079 | 0.069 | 0.178 |
|        |           | 50-54 | 7.4  | 0.59 | 0.092 | 0.098 | 0.178 |
|        |           | 55-59 | 11.8 | 0.59 | 0.121 | 0.149 | 0.178 |
|        |           | 60-64 | 15.8 | 0.65 | 0.157 | 0.190 | 0.178 |
|        |           | 65-69 | 21.3 | 0.89 | 0.151 | 0.205 | 0.217 |
|        |           | 70-74 | 28.8 | 1.35 | 0.159 | 0.196 | 0.217 |
|        |           | 75-79 | 33.2 | 2.12 | 0.167 | 0.152 | 0.190 |
|        |           | 80-84 | 34.3 | 2.56 | 0.136 | 0.126 | 0.190 |
|        |           | 85-89 | 37.2 | 1.94 | 0.114 | 0.173 | 0.190 |
|        |           | 90-94 | 33.0 | 1.43 | 0.123 | 0.211 | 0.190 |
|        |           | 95+   | 27.8 | 1.17 | 0.145 | 0.206 | 0.190 |
| Female | non-Māori | 0-4   | 0.0  | 0.00 | 0.000 | 0.000 | 0.005 |
|        |           | 5-9   | 0.0  | 0.00 | 0.000 | 0.000 | 0.005 |
|        |           | 10-14 | 0.0  | 0.00 | 0.000 | 0.000 | 0.005 |
|        |           | 15-19 | 0.0  | 0.00 | 0.000 | 0.000 | 0.005 |
|        |           | 20-24 | 9.4  | 0.00 | 0.000 | 0.431 | 0.005 |
|        |           | 25-29 | 2.2  | 0.77 | 0.246 | 0.341 | 0.005 |
|        |           | 30-34 | 0.4  | 3.02 | 0.982 | 0.002 | 0.005 |
|        |           | 35-39 | 0.5  | 2.04 | 0.752 | 0.002 | 0.005 |
|        |           | 40-44 | 0.9  | 0.78 | 0.259 | 0.008 | 0.005 |
|        |           | 45-49 | 1.5  | 0.76 | 0.109 | 0.015 | 0.262 |
|        |           | 50-54 | 2.3  | 0.56 | 0.059 | 0.031 | 0.262 |
|        |           | 55-59 | 3.9  | 0.58 | 0.105 | 0.052 | 0.262 |
|        |           | 60-64 | 6.9  | 0.87 | 0.221 | 0.062 | 0.262 |
|        |           | 65-69 | 9.6  | 1.27 | 0.257 | 0.063 | 0.174 |
|        |           | 70-74 | 13.3 | 1.50 | 0.215 | 0.075 | 0.174 |
|        |           | 75-79 | 17.1 | 1.71 | 0.241 | 0.087 | 0.183 |
|        |           | 80-84 | 18.0 | 1.98 | 0.367 | 0.078 | 0.183 |
|        |           | 85-89 | 14.8 | 1.82 | 0.491 | 0.065 | 0.183 |
|        |           | 90-94 | 9.1  | 0.94 | 0.634 | 0.059 | 0.183 |
|        |           | 95+   | 6.5  | 0.35 | 0.731 | 0.058 | 0.183 |

Table S10. Pancreatic cancer input parameters

| Sex  | Ethnic group | Age group (years) | Incidence rate per 100,000 | Case-fatality rate | Remission rate | Prevalence per 1000 | Disability rate |
|------|--------------|-------------------|----------------------------|--------------------|----------------|---------------------|-----------------|
| Male | Māori        | 0-4               | 0.0                        | 0.00               | 0.000          | 0.000               | 0.160           |
|      |              | 5-9               | 0.0                        | 0.00               | 0.000          | 0.000               | 0.160           |
|      |              | 10-14             | 0.0                        | 0.00               | 0.000          | 0.000               | 0.160           |
|      |              | 15-19             | 0.0                        | 0.00               | 0.006          | 0.000               | 0.160           |
|      |              | 20-24             | 0.1                        | 0.01               | 0.338          | 0.002               | 0.160           |
|      |              | 25-29             | 0.1                        | 0.08               | 0.865          | 0.001               | 0.160           |



|        |           |       |       |      |       |       |       |
|--------|-----------|-------|-------|------|-------|-------|-------|
|        |           | 30-34 | 0.6   | 0.25 | 0.365 | 0.007 | 0.160 |
|        |           | 35-39 | 1.3   | 0.41 | 0.049 | 0.021 | 0.160 |
|        |           | 40-44 | 2.5   | 0.53 | 0.049 | 0.038 | 0.160 |
|        |           | 45-49 | 4.8   | 0.61 | 0.075 | 0.062 | 0.160 |
|        |           | 50-54 | 8.9   | 0.63 | 0.096 | 0.105 | 0.160 |
|        |           | 55-59 | 16.3  | 0.63 | 0.065 | 0.199 | 0.160 |
|        |           | 60-64 | 27.5  | 0.62 | 0.044 | 0.361 | 0.160 |
|        |           | 65-69 | 41.0  | 0.69 | 0.033 | 0.524 | 0.160 |
|        |           | 70-74 | 58.0  | 0.79 | 0.022 | 0.670 | 0.160 |
|        |           | 75-79 | 76.5  | 0.83 | 0.014 | 0.853 | 0.160 |
|        |           | 80-84 | 94.9  | 0.82 | 0.012 | 1.079 | 0.160 |
|        |           | 85-89 | 114.3 | 0.79 | 0.012 | 1.357 | 0.160 |
|        |           | 90-94 | 126.8 | 0.87 | 0.012 | 1.447 | 0.160 |
|        |           | 95+   | 132.5 | 0.97 | 0.012 | 1.370 | 0.160 |
| Female | Māori     | 0-4   | 0.0   | 0.00 | 0.000 | 0.000 | 0.183 |
|        |           | 5-9   | 0.0   | 0.00 | 0.000 | 0.000 | 0.183 |
|        |           | 10-14 | 0.0   | 0.00 | 0.000 | 0.000 | 0.183 |
|        |           | 15-19 | 0.0   | 0.00 | 0.006 | 0.000 | 0.183 |
|        |           | 20-24 | 0.1   | 0.03 | 0.335 | 0.001 | 0.183 |
|        |           | 25-29 | 0.1   | 0.12 | 0.857 | 0.001 | 0.183 |
|        |           | 30-34 | 0.4   | 0.25 | 0.355 | 0.005 | 0.183 |
|        |           | 35-39 | 0.9   | 0.38 | 0.037 | 0.016 | 0.183 |
|        |           | 40-44 | 2.2   | 0.53 | 0.039 | 0.031 | 0.183 |
|        |           | 45-49 | 4.2   | 0.70 | 0.047 | 0.051 | 0.183 |
|        |           | 50-54 | 7.2   | 0.79 | 0.050 | 0.077 | 0.183 |
|        |           | 55-59 | 13.3  | 0.75 | 0.040 | 0.145 | 0.183 |
|        |           | 60-64 | 23.1  | 0.70 | 0.031 | 0.274 | 0.183 |
|        |           | 65-69 | 35.4  | 0.77 | 0.026 | 0.413 | 0.183 |
|        |           | 70-74 | 50.3  | 0.87 | 0.020 | 0.538 | 0.183 |
|        |           | 75-79 | 71.2  | 0.96 | 0.016 | 0.693 | 0.183 |
|        |           | 80-84 | 94.7  | 1.13 | 0.018 | 0.812 | 0.183 |
|        |           | 85-89 | 111.3 | 1.33 | 0.022 | 0.828 | 0.183 |
|        |           | 90-94 | 120.8 | 1.48 | 0.023 | 0.808 | 0.183 |
|        |           | 95+   | 124.4 | 1.65 | 0.023 | 0.753 | 0.183 |
| Male   | non-Māori | 0-4   | 0.0   | 0.00 | 0.000 | 0.000 | 0.314 |
|        |           | 5-9   | 0.0   | 0.00 | 0.000 | 0.000 | 0.314 |
|        |           | 10-14 | 0.0   | 0.00 | 0.000 | 0.000 | 0.314 |
|        |           | 15-19 | 0.0   | 0.00 | 0.006 | 0.000 | 0.314 |
|        |           | 20-24 | 0.0   | 0.04 | 0.338 | 0.001 | 0.314 |
|        |           | 25-29 | 0.0   | 0.15 | 0.868 | 0.000 | 0.314 |
|        |           | 30-34 | 0.2   | 0.35 | 0.368 | 0.002 | 0.314 |
|        |           | 35-39 | 0.5   | 0.57 | 0.054 | 0.007 | 0.314 |
|        |           | 40-44 | 1.2   | 0.79 | 0.065 | 0.013 | 0.314 |
|        |           | 45-49 | 2.5   | 0.98 | 0.170 | 0.020 | 0.314 |
|        |           | 50-54 | 4.9   | 1.10 | 0.281 | 0.033 | 0.314 |
|        |           | 55-59 | 9.4   | 1.10 | 0.220 | 0.065 | 0.314 |
|        |           | 60-64 | 16.6  | 1.11 | 0.173 | 0.119 | 0.314 |
|        |           | 65-69 | 25.4  | 1.32 | 0.138 | 0.168 | 0.192 |
|        |           | 70-74 | 36.5  | 1.61 | 0.093 | 0.207 | 0.192 |
|        |           | 75-79 | 47.9  | 1.77 | 0.065 | 0.254 | 0.192 |
|        |           | 80-84 | 58.5  | 1.85 | 0.068 | 0.300 | 0.192 |
|        |           | 85-89 | 70.3  | 2.06 | 0.076 | 0.327 | 0.192 |
|        |           | 90-94 | 81.8  | 2.39 | 0.075 | 0.331 | 0.192 |
|        |           | 95+   | 87.1  | 2.63 | 0.074 | 0.326 | 0.192 |
| Female | non-Māori | 0-4   | 0.0   | 0.00 | 0.000 | 0.000 | 0.369 |
|        |           | 5-9   | 0.0   | 0.00 | 0.000 | 0.000 | 0.369 |
|        |           | 10-14 | 0.0   | 0.00 | 0.000 | 0.000 | 0.369 |

|       |      |      |       |       |       |
|-------|------|------|-------|-------|-------|
| 15-19 | 0.0  | 0.00 | 0.006 | 0.000 | 0.369 |
| 20-24 | 0.0  | 0.07 | 0.327 | 0.001 | 0.369 |
| 25-29 | 0.0  | 0.22 | 0.837 | 0.000 | 0.369 |
| 30-34 | 0.2  | 0.30 | 0.352 | 0.002 | 0.369 |
| 35-39 | 0.4  | 0.45 | 0.045 | 0.006 | 0.369 |
| 40-44 | 1.0  | 0.76 | 0.054 | 0.011 | 0.369 |
| 45-49 | 2.2  | 1.15 | 0.087 | 0.017 | 0.369 |
| 50-54 | 4.2  | 1.40 | 0.116 | 0.025 | 0.369 |
| 55-59 | 8.3  | 1.40 | 0.105 | 0.050 | 0.369 |
| 60-64 | 15.2 | 1.38 | 0.095 | 0.095 | 0.369 |
| 65-69 | 24.0 | 1.60 | 0.088 | 0.138 | 0.230 |
| 70-74 | 34.6 | 1.87 | 0.071 | 0.173 | 0.230 |
| 75-79 | 47.3 | 2.00 | 0.060 | 0.223 | 0.230 |
| 80-84 | 60.4 | 2.13 | 0.067 | 0.270 | 0.230 |
| 85-89 | 70.5 | 2.41 | 0.079 | 0.282 | 0.230 |
| 90-94 | 78.0 | 2.65 | 0.081 | 0.285 | 0.230 |
| 95+   | 81.8 | 2.84 | 0.082 | 0.283 | 0.230 |

Table S11. Cervical cancer input parameters

| Sex    | Ethnic group | Age group (years) | Incidence rate per 100,000 | Case-fatality rate | Remission rate | Prevalence per 1000 | Disability rate |
|--------|--------------|-------------------|----------------------------|--------------------|----------------|---------------------|-----------------|
| Female | Māori        | 0-4               | 0.0                        | 0.000              | 0.0            | 0.00                | 0.127           |
|        |              | 5-9               | 0.0                        | 0.000              | 0.000          | 0.00                | 0.127           |
|        |              | 10-14             | 0.0                        | 0.000              | 0.000          | 0.00                | 0.127           |
|        |              | 15-19             | 0.0                        | 0.000              | 0.000          | 0.00                | 0.127           |
|        |              | 20-24             | 2.3                        | 0.000              | 0.000          | 0.05                | 0.127           |
|        |              | 25-29             | 7.7                        | 0.004              | 0.000          | 0.29                | 0.127           |
|        |              | 30-34             | 13.1                       | 0.017              | 0.028          | 0.59                | 0.127           |
|        |              | 35-39             | 18.9                       | 0.024              | 0.131          | 0.71                | 0.127           |
|        |              | 40-44             | 21.7                       | 0.037              | 0.221          | 0.76                | 0.127           |
|        |              | 45-49             | 21.1                       | 0.050              | 0.236          | 0.79                | 0.127           |
|        |              | 50-54             | 20.8                       | 0.062              | 0.214          | 0.81                | 0.127           |
|        |              | 55-59             | 22.3                       | 0.090              | 0.183          | 0.91                | 0.127           |
|        |              | 60-64             | 20.9                       | 0.117              | 0.128          | 0.97                | 0.127           |
|        |              | 65-69             | 17.3                       | 0.135              | 0.098          | 0.92                | 0.093           |
|        |              | 70-74             | 13.0                       | 0.138              | 0.073          | 0.82                | 0.093           |
|        |              | 75-79             | 9.6                        | 0.099              | 0.045          | 0.77                | 0.093           |
|        |              | 80-84             | 9.3                        | 0.043              | 0.020          | 0.91                | 0.093           |
|        |              | 85-89             | 11.4                       | 0.033              | 0.006          | 1.23                | 0.093           |
|        |              | 90-94             | 6.7                        | 0.034              | 0.004          | 1.44                | 0.093           |
| 95+    | 2.1          | 0.035             | 0.004                      | 1.33               | 0.093          |                     |                 |
| Female | non-Māori    | 0-4               | 0.0                        | 0.000              | 0.000          | 0.00                | 0.209           |
|        |              | 5-9               | 0.0                        | 0.000              | 0.000          | 0.00                | 0.209           |
|        |              | 10-14             | 0.0                        | 0.000              | 0.000          | 0.00                | 0.209           |
|        |              | 15-19             | 0.0                        | 0.000              | 0.000          | 0.00                | 0.209           |
|        |              | 20-24             | 1.7                        | 0.001              | 0.000          | 0.04                | 0.209           |
|        |              | 25-29             | 6.2                        | 0.006              | 0.050          | 0.21                | 0.209           |
|        |              | 30-34             | 10.1                       | 0.018              | 0.230          | 0.37                | 0.209           |
|        |              | 35-39             | 12.7                       | 0.040              | 0.347          | 0.35                | 0.209           |
|        |              | 40-44             | 13.2                       | 0.034              | 0.352          | 0.33                | 0.209           |
|        |              | 45-49             | 12.1                       | 0.015              | 0.304          | 0.36                | 0.130           |
|        |              | 50-54             | 10.8                       | 0.025              | 0.242          | 0.39                | 0.130           |
|        |              | 55-59             | 10.1                       | 0.057              | 0.183          | 0.41                | 0.107           |
|        |              | 60-64             | 9.8                        | 0.085              | 0.157          | 0.41                | 0.107           |

|       |     |       |       |      |       |
|-------|-----|-------|-------|------|-------|
| 65-69 | 9.2 | 0.104 | 0.147 | 0.39 | 0.119 |
| 70-74 | 8.5 | 0.149 | 0.126 | 0.35 | 0.119 |
| 75-79 | 8.0 | 0.202 | 0.084 | 0.30 | 0.109 |
| 80-84 | 8.0 | 0.212 | 0.049 | 0.29 | 0.109 |
| 85-89 | 8.7 | 0.175 | 0.057 | 0.33 | 0.056 |
| 90-94 | 8.7 | 0.123 | 0.088 | 0.38 | 0.056 |
| 95+   | 8.1 | 0.082 | 0.117 | 0.40 | 0.056 |

Table S12. Bladder cancer input parameters

| Sex    | Ethnic group | Age group (years) | Incidence rate per 100,000 | Case-fatality rate | Remission rate | Prevalence per 1000 | Disability rate |
|--------|--------------|-------------------|----------------------------|--------------------|----------------|---------------------|-----------------|
| Male   | Māori        | 0-4               | 0.0                        | 0.000              | 0.000          | 0.000               | 0.232           |
|        |              | 5-9               | 0.0                        | 0.000              | 0.000          | 0.000               | 0.232           |
|        |              | 10-14             | 0.0                        | 0.000              | 0.000          | 0.000               | 0.232           |
|        |              | 15-19             | 0.0                        | 0.000              | 0.000          | 0.000               | 0.232           |
|        |              | 20-24             | 0.3                        | 0.000              | 0.000          | 0.005               | 0.232           |
|        |              | 25-29             | 1.0                        | 0.063              | 0.083          | 0.030               | 0.232           |
|        |              | 30-34             | 1.6                        | 0.262              | 0.349          | 0.031               | 0.232           |
|        |              | 35-39             | 2.6                        | 0.270              | 0.366          | 0.035               | 0.232           |
|        |              | 40-44             | 4.2                        | 0.192              | 0.273          | 0.071               | 0.232           |
|        |              | 45-49             | 6.4                        | 0.166              | 0.275          | 0.122               | 0.232           |
|        |              | 50-54             | 9.6                        | 0.182              | 0.314          | 0.173               | 0.232           |
|        |              | 55-59             | 13.4                       | 0.240              | 0.314          | 0.222               | 0.232           |
|        |              | 60-64             | 18.9                       | 0.267              | 0.274          | 0.305               | 0.232           |
|        |              | 65-69             | 31.1                       | 0.184              | 0.210          | 0.580               | 0.208           |
|        |              | 70-74             | 45.4                       | 0.175              | 0.160          | 1.077               | 0.208           |
|        |              | 75-79             | 58.8                       | 0.281              | 0.135          | 1.353               | 0.208           |
|        |              | 80-84             | 67.7                       | 0.324              | 0.123          | 1.444               | 0.208           |
|        |              | 85-89             | 73.4                       | 0.279              | 0.122          | 1.692               | 0.208           |
| 90-94  | 98.9         | 0.377             | 0.121                      | 1.932              | 0.208          |                     |                 |
| 95+    | 132.3        | 0.554             | 0.117                      | 2.079              | 0.208          |                     |                 |
| Female | Māori        | 0-4               | 0.0                        | 0.000              | 0.000          | 0.000               | 0.163           |
|        |              | 5-9               | 0.0                        | 0.000              | 0.000          | 0.000               | 0.163           |
|        |              | 10-14             | 0.0                        | 0.000              | 0.000          | 0.000               | 0.163           |
|        |              | 15-19             | 0.0                        | 0.000              | 0.000          | 0.000               | 0.163           |
|        |              | 20-24             | 0.2                        | 0.000              | 0.000          | 0.003               | 0.163           |
|        |              | 25-29             | 0.6                        | 0.054              | 0.000          | 0.020               | 0.163           |
|        |              | 30-34             | 1.0                        | 0.245              | 0.000          | 0.036               | 0.163           |
|        |              | 35-39             | 1.5                        | 0.347              | 0.007          | 0.038               | 0.163           |
|        |              | 40-44             | 2.2                        | 0.326              | 0.066          | 0.048               | 0.163           |
|        |              | 45-49             | 3.2                        | 0.291              | 0.168          | 0.064               | 0.163           |
|        |              | 50-54             | 4.9                        | 0.305              | 0.206          | 0.084               | 0.163           |
|        |              | 55-59             | 7.7                        | 0.343              | 0.163          | 0.131               | 0.163           |
|        |              | 60-64             | 10.6                       | 0.353              | 0.232          | 0.169               | 0.163           |
|        |              | 65-69             | 14.6                       | 0.265              | 0.200          | 0.256               | 0.163           |
|        |              | 70-74             | 19.8                       | 0.208              | 0.178          | 0.431               | 0.163           |
|        |              | 75-79             | 26.2                       | 0.262              | 0.251          | 0.511               | 0.163           |
|        |              | 80-84             | 36.0                       | 0.545              | 0.307          | 0.455               | 0.163           |
|        |              | 85-89             | 50.1                       | 1.130              | 0.264          | 0.369               | 0.163           |
| 90-94  | 60.8         | 1.624             | 0.175                      | 0.339              | 0.163          |                     |                 |
| 95+    | 63.4         | 1.856             | 0.174                      | 0.315              | 0.163          |                     |                 |
| Male   | non-Māori    | 0-4               | 0.0                        | 0.000              | 0.000          | 0.000               | 0.145           |
|        |              | 5-9               | 0.0                        | 0.000              | 0.000          | 0.000               | 0.145           |
|        |              | 10-14             | 0.0                        | 0.000              | 0.000          | 0.000               | 0.145           |

|        |           |       |       |       |       |       |       |
|--------|-----------|-------|-------|-------|-------|-------|-------|
|        |           | 15-19 | 0.0   | 0.000 | 0.000 | 0.000 | 0.145 |
|        |           | 20-24 | 0.2   | 0.000 | 0.000 | 0.008 | 0.145 |
|        |           | 25-29 | 0.5   | 0.010 | 0.039 | 0.025 | 0.145 |
|        |           | 30-34 | 1.1   | 0.044 | 0.176 | 0.041 | 0.145 |
|        |           | 35-39 | 2.1   | 0.052 | 0.258 | 0.054 | 0.145 |
|        |           | 40-44 | 4.0   | 0.043 | 0.225 | 0.098 | 0.145 |
|        |           | 45-49 | 8.1   | 0.037 | 0.183 | 0.219 | 0.128 |
|        |           | 50-54 | 15.7  | 0.040 | 0.197 | 0.438 | 0.128 |
|        |           | 55-59 | 29.2  | 0.055 | 0.217 | 0.777 | 0.144 |
|        |           | 60-64 | 51.9  | 0.071 | 0.249 | 1.263 | 0.144 |
|        |           | 65-69 | 85.4  | 0.084 | 0.239 | 2.037 | 0.140 |
|        |           | 70-74 | 127.5 | 0.089 | 0.208 | 3.306 | 0.140 |
|        |           | 75-79 | 175.3 | 0.105 | 0.219 | 4.716 | 0.110 |
|        |           | 80-84 | 220.5 | 0.158 | 0.269 | 5.213 | 0.110 |
|        |           | 85-89 | 255.6 | 0.303 | 0.275 | 4.727 | 0.093 |
|        |           | 90-94 | 291.7 | 0.591 | 0.184 | 3.959 | 0.093 |
|        |           | 95+   | 309.9 | 0.812 | 0.145 | 3.351 | 0.093 |
| Female | non-Māori | 0-4   | 0.0   | 0.000 | 0.000 | 0.000 | 0.114 |
|        |           | 5-9   | 0.0   | 0.000 | 0.000 | 0.000 | 0.114 |
|        |           | 10-14 | 0.0   | 0.000 | 0.000 | 0.000 | 0.114 |
|        |           | 15-19 | 0.0   | 0.000 | 0.000 | 0.000 | 0.114 |
|        |           | 20-24 | 0.1   | 0.000 | 0.000 | 0.019 | 0.114 |
|        |           | 25-29 | 0.3   | 0.033 | 0.065 | 0.029 | 0.114 |
|        |           | 30-34 | 0.7   | 0.141 | 0.279 | 0.022 | 0.114 |
|        |           | 35-39 | 1.2   | 0.154 | 0.333 | 0.021 | 0.114 |
|        |           | 40-44 | 2.2   | 0.103 | 0.298 | 0.042 | 0.114 |
|        |           | 45-49 | 3.8   | 0.067 | 0.281 | 0.082 | 0.155 |
|        |           | 50-54 | 6.6   | 0.045 | 0.350 | 0.139 | 0.155 |
|        |           | 55-59 | 11.2  | 0.022 | 0.504 | 0.191 | 0.134 |
|        |           | 60-64 | 16.8  | 0.019 | 0.445 | 0.296 | 0.134 |
|        |           | 65-69 | 23.8  | 0.050 | 0.287 | 0.531 | 0.150 |
|        |           | 70-74 | 33.2  | 0.078 | 0.196 | 0.910 | 0.150 |
|        |           | 75-79 | 44.9  | 0.121 | 0.216 | 1.234 | 0.107 |
|        |           | 80-84 | 58.9  | 0.237 | 0.255 | 1.235 | 0.107 |
|        |           | 85-89 | 72.6  | 0.434 | 0.215 | 1.152 | 0.068 |
|        |           | 90-94 | 79.4  | 0.648 | 0.183 | 1.000 | 0.068 |
|        |           | 95+   | 79.0  | 0.711 | 0.249 | 0.836 | 0.068 |

Table S13. Kidney cancer input parameters

| Sex  | Ethnic group | Age group (years) | Incidence rate per 100,000 | Case-fatality rate | Remission rate | Prevalence per 1000 | Disability rate |
|------|--------------|-------------------|----------------------------|--------------------|----------------|---------------------|-----------------|
| Male | Māori        | 0-4               | 0.0                        | 0.000              | 0.000          | 0.000               | 0.265           |
|      |              | 5-9               | 0.0                        | 0.000              | 0.000          | 0.000               | 0.265           |
|      |              | 10-14             | 0.0                        | 0.000              | 0.000          | 0.000               | 0.265           |
|      |              | 15-19             | 0.1                        | 0.000              | 0.000          | 0.002               | 0.265           |
|      |              | 20-24             | 0.3                        | 0.000              | 0.000          | 0.013               | 0.265           |
|      |              | 25-29             | 0.7                        | 0.003              | 0.039          | 0.033               | 0.265           |
|      |              | 30-34             | 2.1                        | 0.016              | 0.169          | 0.068               | 0.265           |
|      |              | 35-39             | 4.1                        | 0.044              | 0.210          | 0.115               | 0.265           |
|      |              | 40-44             | 7.3                        | 0.058              | 0.222          | 0.192               | 0.265           |
|      |              | 45-49             | 12.7                       | 0.093              | 0.240          | 0.304               | 0.265           |
|      |              | 50-54             | 19.6                       | 0.147              | 0.225          | 0.444               | 0.265           |
|      |              | 55-59             | 27.3                       | 0.153              | 0.204          | 0.634               | 0.265           |
|      |              | 60-64             | 37.3                       | 0.170              | 0.193          | 0.892               | 0.265           |

|        |           |       |      |       |       |       |       |
|--------|-----------|-------|------|-------|-------|-------|-------|
|        |           | 65-69 | 45.1 | 0.230 | 0.216 | 1.009 | 0.111 |
|        |           | 70-74 | 51.2 | 0.256 | 0.186 | 1.078 | 0.111 |
|        |           | 75-79 | 48.6 | 0.257 | 0.130 | 1.240 | 0.111 |
|        |           | 80-84 | 41.6 | 0.272 | 0.115 | 1.138 | 0.111 |
|        |           | 85-89 | 40.1 | 0.274 | 0.111 | 1.080 | 0.111 |
|        |           | 90-94 | 24.8 | 0.284 | 0.115 | 0.825 | 0.111 |
|        |           | 95+   | 14.1 | 0.288 | 0.116 | 0.433 | 0.111 |
| Female | Māori     | 0-4   | 0.0  | 0.000 | 0.000 | 0.000 | 0.199 |
|        |           | 5-9   | 0.0  | 0.000 | 0.000 | 0.000 | 0.199 |
|        |           | 10-14 | 0.0  | 0.000 | 0.000 | 0.000 | 0.199 |
|        |           | 15-19 | 0.1  | 0.000 | 0.000 | 0.001 | 0.199 |
|        |           | 20-24 | 0.2  | 0.000 | 0.000 | 0.008 | 0.199 |
|        |           | 25-29 | 0.6  | 0.002 | 0.063 | 0.023 | 0.199 |
|        |           | 30-34 | 1.9  | 0.012 | 0.266 | 0.047 | 0.199 |
|        |           | 35-39 | 3.3  | 0.031 | 0.284 | 0.078 | 0.199 |
|        |           | 40-44 | 5.2  | 0.040 | 0.243 | 0.134 | 0.199 |
|        |           | 45-49 | 8.2  | 0.082 | 0.234 | 0.209 | 0.199 |
|        |           | 50-54 | 12.3 | 0.140 | 0.211 | 0.294 | 0.199 |
|        |           | 55-59 | 16.6 | 0.138 | 0.202 | 0.410 | 0.199 |
|        |           | 60-64 | 20.6 | 0.165 | 0.163 | 0.549 | 0.199 |
|        |           | 65-69 | 23.0 | 0.216 | 0.149 | 0.620 | 0.118 |
|        |           | 70-74 | 24.8 | 0.235 | 0.115 | 0.661 | 0.118 |
|        |           | 75-79 | 25.0 | 0.263 | 0.087 | 0.726 | 0.118 |
|        |           | 80-84 | 23.0 | 0.379 | 0.093 | 0.587 | 0.118 |
|        |           | 85-89 | 19.9 | 0.540 | 0.085 | 0.380 | 0.118 |
|        |           | 90-94 | 14.4 | 0.608 | 0.113 | 0.234 | 0.118 |
|        |           | 95+   | 9.4  | 0.658 | 0.145 | 0.131 | 0.118 |
| Male   | non-Māori | 0-4   | 0.0  | 0.000 | 0.000 | 0.000 | 0.131 |
|        |           | 5-9   | 0.0  | 0.000 | 0.000 | 0.000 | 0.131 |
|        |           | 10-14 | 0.0  | 0.000 | 0.000 | 0.000 | 0.131 |
|        |           | 15-19 | 0.0  | 0.000 | 0.000 | 0.000 | 0.131 |
|        |           | 20-24 | 0.4  | 0.000 | 0.000 | 0.014 | 0.131 |
|        |           | 25-29 | 0.7  | 0.002 | 0.023 | 0.039 | 0.131 |
|        |           | 30-34 | 1.5  | 0.012 | 0.101 | 0.070 | 0.131 |
|        |           | 35-39 | 3.2  | 0.027 | 0.129 | 0.119 | 0.131 |
|        |           | 40-44 | 6.0  | 0.037 | 0.156 | 0.208 | 0.131 |
|        |           | 45-49 | 11.1 | 0.055 | 0.189 | 0.333 | 0.146 |
|        |           | 50-54 | 18.6 | 0.083 | 0.196 | 0.516 | 0.146 |
|        |           | 55-59 | 28.4 | 0.093 | 0.208 | 0.758 | 0.164 |
|        |           | 60-64 | 42.3 | 0.112 | 0.229 | 1.066 | 0.164 |
|        |           | 65-69 | 54.5 | 0.162 | 0.302 | 1.186 | 0.207 |
|        |           | 70-74 | 66.3 | 0.193 | 0.316 | 1.230 | 0.207 |
|        |           | 75-79 | 72.5 | 0.233 | 0.308 | 1.352 | 0.170 |
|        |           | 80-84 | 74.6 | 0.380 | 0.382 | 1.102 | 0.170 |
|        |           | 85-89 | 78.2 | 0.602 | 0.475 | 0.775 | 0.172 |
|        |           | 90-94 | 57.7 | 0.679 | 0.500 | 0.534 | 0.172 |
|        |           | 95+   | 39.8 | 0.687 | 0.500 | 0.327 | 0.172 |
| Female | non-Māori | 0-4   | 0.0  | 0.000 | 0.000 | 0.000 | 0.144 |
|        |           | 5-9   | 0.0  | 0.000 | 0.000 | 0.000 | 0.144 |
|        |           | 10-14 | 0.0  | 0.000 | 0.000 | 0.000 | 0.144 |
|        |           | 15-19 | 0.0  | 0.000 | 0.000 | 0.000 | 0.144 |
|        |           | 20-24 | 0.2  | 0.000 | 0.000 | 0.009 | 0.144 |
|        |           | 25-29 | 0.5  | 0.002 | 0.030 | 0.026 | 0.144 |
|        |           | 30-34 | 1.2  | 0.010 | 0.128 | 0.048 | 0.144 |
|        |           | 35-39 | 2.2  | 0.026 | 0.154 | 0.079 | 0.144 |
|        |           | 40-44 | 3.8  | 0.036 | 0.170 | 0.130 | 0.144 |
|        |           | 45-49 | 7.1  | 0.055 | 0.200 | 0.206 | 0.179 |

|       |      |       |       |       |       |
|-------|------|-------|-------|-------|-------|
| 50-54 | 12.1 | 0.083 | 0.206 | 0.323 | 0.179 |
| 55-59 | 17.3 | 0.090 | 0.208 | 0.469 | 0.180 |
| 60-64 | 23.9 | 0.101 | 0.203 | 0.657 | 0.180 |
| 65-69 | 28.2 | 0.136 | 0.233 | 0.757 | 0.132 |
| 70-74 | 32.7 | 0.156 | 0.222 | 0.802 | 0.132 |
| 75-79 | 34.0 | 0.181 | 0.201 | 0.891 | 0.166 |
| 80-84 | 31.5 | 0.262 | 0.249 | 0.730 | 0.166 |
| 85-89 | 30.0 | 0.364 | 0.316 | 0.497 | 0.124 |
| 90-94 | 21.3 | 0.390 | 0.345 | 0.333 | 0.124 |
| 95+   | 14.8 | 0.395 | 0.356 | 0.201 | 0.124 |

Table S14. Endometrial cancer input parameters

| Sex    | Ethnic group | Age group (years) | Incidence rate per 100,000 | Case-fatality rate | Remission rate | Prevalence per 1000 | Disability rate |
|--------|--------------|-------------------|----------------------------|--------------------|----------------|---------------------|-----------------|
| Female | Māori        | 0-4               | 0.0                        | 0.000              | 0.000          | 0.00                | 0.231           |
|        |              | 5-9               | 0.0                        | 0.000              | 0.000          | 0.00                | 0.231           |
|        |              | 10-14             | 0.0                        | 0.000              | 0.000          | 0.00                | 0.231           |
|        |              | 15-19             | 0.0                        | 0.000              | 0.000          | 0.00                | 0.231           |
|        |              | 20-24             | 0.3                        | 0.000              | 0.000          | 0.01                | 0.231           |
|        |              | 25-29             | 1.6                        | 0.007              | 0.031          | 0.05                | 0.231           |
|        |              | 30-34             | 4.5                        | 0.034              | 0.149          | 0.14                | 0.231           |
|        |              | 35-39             | 8.2                        | 0.058              | 0.260          | 0.22                | 0.231           |
|        |              | 40-44             | 15.2                       | 0.061              | 0.284          | 0.34                | 0.231           |
|        |              | 45-49             | 29.1                       | 0.058              | 0.237          | 0.67                | 0.212           |
|        |              | 50-54             | 49.6                       | 0.062              | 0.189          | 1.33                | 0.212           |
|        |              | 55-59             | 69.4                       | 0.062              | 0.186          | 2.17                | 0.212           |
|        |              | 60-64             | 75.8                       | 0.066              | 0.210          | 2.63                | 0.212           |
|        |              | 65-69             | 72.3                       | 0.096              | 0.216          | 2.53                | 0.161           |
|        |              | 70-74             | 75.1                       | 0.160              | 0.223          | 2.16                | 0.161           |
|        |              | 75-79             | 79.7                       | 0.210              | 0.206          | 1.94                | 0.102           |
|        |              | 80-84             | 76.7                       | 0.216              | 0.162          | 1.98                | 0.102           |
|        |              | 85-89             | 69.8                       | 0.210              | 0.149          | 2.00                | 0.102           |
|        |              | 90-94             | 54.4                       | 0.217              | 0.153          | 1.71                | 0.102           |
|        |              | 95+               | 42.6                       | 0.225              | 0.158          | 1.21                | 0.102           |
| Female | non-Māori    | 0-4               | 0.0                        | 0.000              | 0.000          | 0.00                | 0.176           |
|        |              | 5-9               | 0.0                        | 0.000              | 0.000          | 0.00                | 0.176           |
|        |              | 10-14             | 0.0                        | 0.000              | 0.000          | 0.00                | 0.176           |
|        |              | 15-19             | 0.0                        | 0.000              | 0.000          | 0.00                | 0.176           |
|        |              | 20-24             | 0.1                        | 0.000              | 0.000          | 0.01                | 0.176           |
|        |              | 25-29             | 0.3                        | 0.005              | 0.009          | 0.02                | 0.176           |
|        |              | 30-34             | 1.8                        | 0.019              | 0.050          | 0.06                | 0.176           |
|        |              | 35-39             | 3.5                        | 0.022              | 0.116          | 0.14                | 0.176           |
|        |              | 40-44             | 6.7                        | 0.024              | 0.128          | 0.25                | 0.176           |
|        |              | 45-49             | 12.8                       | 0.031              | 0.097          | 0.49                | 0.187           |
|        |              | 50-54             | 22.5                       | 0.035              | 0.093          | 0.92                | 0.187           |
|        |              | 55-59             | 35.6                       | 0.034              | 0.121          | 1.51                | 0.179           |
|        |              | 60-64             | 46.8                       | 0.041              | 0.159          | 1.99                | 0.179           |
|        |              | 65-69             | 54.8                       | 0.066              | 0.171          | 2.21                | 0.153           |
|        |              | 70-74             | 59.0                       | 0.096              | 0.203          | 2.14                | 0.153           |
|        |              | 75-79             | 59.9                       | 0.120              | 0.207          | 1.90                | 0.144           |
|        |              | 80-84             | 58.0                       | 0.139              | 0.180          | 1.87                | 0.144           |
|        |              | 85-89             | 53.1                       | 0.162              | 0.220          | 1.61                | 0.070           |
|        |              | 90-94             | 47.8                       | 0.201              | 0.253          | 1.21                | 0.070           |
|        |              | 95+               | 43.6                       | 0.130              | 0.168          | 0.56                | 0.070           |

Table S15. Melanoma input parameters

| Sex    | Ethnic group | Age group (years) | Incidence rate per 100,000 | Case-fatality rate | Remission rate | Prevalence per 1000 | Disability rate |
|--------|--------------|-------------------|----------------------------|--------------------|----------------|---------------------|-----------------|
| Male   | Māori        | 0-4               | 0.0                        | 0.000              | 0.000          | 0.00                | 0.080           |
|        |              | 5-9               | 0.0                        | 0.000              | 0.000          | 0.00                | 0.080           |
|        |              | 10-14             | 0.0                        | 0.000              | 0.000          | 0.00                | 0.080           |
|        |              | 15-19             | 0.0                        | 0.000              | 0.000          | 0.00                | 0.080           |
|        |              | 20-24             | 1.7                        | 0.001              | 0.000          | 0.06                | 0.080           |
|        |              | 25-29             | 3.0                        | 0.008              | 0.044          | 0.17                | 0.080           |
|        |              | 30-34             | 4.7                        | 0.022              | 0.190          | 0.22                | 0.080           |
|        |              | 35-39             | 6.1                        | 0.035              | 0.229          | 0.22                | 0.080           |
|        |              | 40-44             | 7.8                        | 0.038              | 0.222          | 0.26                | 0.080           |
|        |              | 45-49             | 10.6                       | 0.036              | 0.216          | 0.34                | 0.080           |
|        |              | 50-54             | 14.5                       | 0.038              | 0.213          | 0.47                | 0.080           |
|        |              | 55-59             | 19.8                       | 0.047              | 0.277          | 0.57                | 0.080           |
|        |              | 60-64             | 28.1                       | 0.063              | 0.351          | 0.64                | 0.080           |
|        |              | 65-69             | 37.0                       | 0.089              | 0.368          | 0.75                | 0.061           |
|        |              | 70-74             | 46.5                       | 0.101              | 0.358          | 0.92                | 0.061           |
|        |              | 75-79             | 57.6                       | 0.107              | 0.363          | 1.14                | 0.061           |
|        |              | 80-84             | 66.9                       | 0.116              | 0.393          | 1.28                | 0.061           |
|        |              | 85-89             | 67.0                       | 0.102              | 0.444          | 1.26                | 0.061           |
|        |              | 90-94             | 59.0                       | 0.076              | 0.491          | 1.11                | 0.061           |
| 95+    | 52.9         | 0.054             | 0.519                      | 0.94               | 0.061          |                     |                 |
| Female | Māori        | 0-4               | 0.0                        | 0.000              | 0.000          | 0.00                | 0.181           |
|        |              | 5-9               | 0.0                        | 0.000              | 0.000          | 0.00                | 0.181           |
|        |              | 10-14             | 0.0                        | 0.000              | 0.000          | 0.00                | 0.181           |
|        |              | 15-19             | 0.0                        | 0.000              | 0.000          | 0.00                | 0.181           |
|        |              | 20-24             | 1.6                        | 0.001              | 0.000          | 0.06                | 0.181           |
|        |              | 25-29             | 3.4                        | 0.007              | 0.078          | 0.16                | 0.181           |
|        |              | 30-34             | 7.0                        | 0.020              | 0.335          | 0.20                | 0.181           |
|        |              | 35-39             | 9.1                        | 0.031              | 0.409          | 0.20                | 0.181           |
|        |              | 40-44             | 10.7                       | 0.033              | 0.368          | 0.24                | 0.181           |
|        |              | 45-49             | 12.7                       | 0.031              | 0.313          | 0.31                | 0.181           |
|        |              | 50-54             | 14.9                       | 0.033              | 0.258          | 0.43                | 0.181           |
|        |              | 55-59             | 17.6                       | 0.042              | 0.273          | 0.52                | 0.181           |
|        |              | 60-64             | 21.3                       | 0.056              | 0.284          | 0.58                | 0.181           |
|        |              | 65-69             | 25.3                       | 0.079              | 0.256          | 0.68                | 0.199           |
|        |              | 70-74             | 29.5                       | 0.089              | 0.221          | 0.84                | 0.199           |
|        |              | 75-79             | 34.3                       | 0.095              | 0.205          | 1.03                | 0.199           |
|        |              | 80-84             | 37.3                       | 0.110              | 0.227          | 1.12                | 0.199           |
|        |              | 85-89             | 35.0                       | 0.112              | 0.291          | 0.98                | 0.199           |
|        |              | 90-94             | 29.8                       | 0.096              | 0.346          | 0.77                | 0.199           |
| 95+    | 25.6         | 0.080             | 0.388                      | 0.58               | 0.199          |                     |                 |
| Male   | non-Māori    | 0-4               | 0.0                        | 0.000              | 0.000          | 0.00                | 0.111           |
|        |              | 5-9               | 0.0                        | 0.000              | 0.000          | 0.00                | 0.111           |
|        |              | 10-14             | 0.0                        | 0.000              | 0.000          | 0.00                | 0.111           |
|        |              | 15-19             | 0.0                        | 0.000              | 0.000          | 0.00                | 0.111           |
|        |              | 20-24             | 11.0                       | 0.001              | 0.000          | 0.42                | 0.111           |
|        |              | 25-29             | 14.8                       | 0.006              | 0.021          | 1.07                | 0.111           |
|        |              | 30-34             | 20.4                       | 0.012              | 0.092          | 1.49                | 0.111           |
|        |              | 35-39             | 27.8                       | 0.017              | 0.119          | 1.69                | 0.111           |
|        |              | 40-44             | 38.4                       | 0.018              | 0.133          | 2.02                | 0.111           |
|        |              | 45-49             | 54.9                       | 0.018              | 0.139          | 2.56                | 0.150           |

|        |           |       |       |       |       |      |       |
|--------|-----------|-------|-------|-------|-------|------|-------|
|        |           | 50-54 | 78.2  | 0.019 | 0.145 | 3.52 | 0.150 |
|        |           | 55-59 | 109.9 | 0.024 | 0.207 | 4.30 | 0.161 |
|        |           | 60-64 | 157.1 | 0.032 | 0.270 | 4.82 | 0.161 |
|        |           | 65-69 | 205.2 | 0.045 | 0.285 | 5.60 | 0.170 |
|        |           | 70-74 | 252.0 | 0.051 | 0.278 | 6.83 | 0.170 |
|        |           | 75-79 | 301.5 | 0.055 | 0.280 | 8.22 | 0.129 |
|        |           | 80-84 | 339.6 | 0.077 | 0.302 | 8.96 | 0.129 |
|        |           | 85-89 | 340.2 | 0.126 | 0.335 | 8.08 | 0.137 |
|        |           | 90-94 | 315.2 | 0.202 | 0.345 | 6.41 | 0.137 |
|        |           | 95+   | 292.1 | 0.278 | 0.354 | 4.84 | 0.137 |
| Female | non-Māori | 0-4   | 0.0   | 0.000 | 0.000 | 0.00 | 0.166 |
|        |           | 5-9   | 0.0   | 0.000 | 0.000 | 0.00 | 0.166 |
|        |           | 10-14 | 0.0   | 0.000 | 0.000 | 0.00 | 0.166 |
|        |           | 15-19 | 0.0   | 0.000 | 0.000 | 0.00 | 0.166 |
|        |           | 20-24 | 11.6  | 0.001 | 0.000 | 0.41 | 0.166 |
|        |           | 25-29 | 20.3  | 0.005 | 0.046 | 1.16 | 0.166 |
|        |           | 30-34 | 32.0  | 0.011 | 0.197 | 1.52 | 0.166 |
|        |           | 35-39 | 42.3  | 0.015 | 0.246 | 1.52 | 0.166 |
|        |           | 40-44 | 53.2  | 0.017 | 0.238 | 1.80 | 0.166 |
|        |           | 45-49 | 66.3  | 0.016 | 0.211 | 2.31 | 0.167 |
|        |           | 50-54 | 80.5  | 0.017 | 0.176 | 3.20 | 0.167 |
|        |           | 55-59 | 96.9  | 0.021 | 0.202 | 3.91 | 0.128 |
|        |           | 60-64 | 117.5 | 0.028 | 0.215 | 4.38 | 0.128 |
|        |           | 65-69 | 137.5 | 0.039 | 0.193 | 5.12 | 0.126 |
|        |           | 70-74 | 155.8 | 0.044 | 0.166 | 6.24 | 0.126 |
|        |           | 75-79 | 172.2 | 0.048 | 0.151 | 7.50 | 0.098 |
|        |           | 80-84 | 179.5 | 0.056 | 0.169 | 8.14 | 0.098 |
|        |           | 85-89 | 167.7 | 0.059 | 0.236 | 7.00 | 0.096 |
|        |           | 90-94 | 145.2 | 0.055 | 0.300 | 5.10 | 0.096 |
|        |           | 95+   | 127.1 | 0.051 | 0.347 | 3.51 | 0.096 |

Table S16. Thyroid cancer input parameters

| Sex  | Ethnic group | Age group (years) | Incidence rate per 100,000 | Case-fatality rate | Remission rate | Prevalence per 1000 | Disability rate |
|------|--------------|-------------------|----------------------------|--------------------|----------------|---------------------|-----------------|
| Male | Māori        | 0-4               | 0.0                        | 0.0000             | 0.00           | 0.000               | 0.135           |
|      |              | 5-9               | 0.0                        | 0.0000             | 0.00           | 0.000               | 0.135           |
|      |              | 10-14             | 0.0                        | 0.0000             | 0.00           | 0.000               | 0.135           |
|      |              | 15-19             | 0.6                        | 0.0000             | 0.00           | 0.014               | 0.135           |
|      |              | 20-24             | 1.5                        | 0.0001             | 0.00           | 0.070               | 0.135           |
|      |              | 25-29             | 1.4                        | 0.0000             | 0.02           | 0.138               | 0.135           |
|      |              | 30-34             | 2.2                        | 0.0000             | 0.10           | 0.176               | 0.135           |
|      |              | 35-39             | 3.3                        | 0.0002             | 0.14           | 0.196               | 0.135           |
|      |              | 40-44             | 4.3                        | 0.0018             | 0.14           | 0.236               | 0.135           |
|      |              | 45-49             | 5.4                        | 0.0100             | 0.15           | 0.284               | 0.135           |
|      |              | 50-54             | 6.9                        | 0.0190             | 0.18           | 0.318               | 0.135           |
|      |              | 55-59             | 8.8                        | 0.0160             | 0.23           | 0.342               | 0.135           |
|      |              | 60-64             | 10.7                       | 0.0110             | 0.29           | 0.361               | 0.135           |
|      |              | 65-69             | 12.4                       | 0.0122             | 0.44           | 0.312               | 0.135           |
|      |              | 70-74             | 13.4                       | 0.0129             | 0.53           | 0.254               | 0.135           |
|      |              | 75-79             | 12.5                       | 0.0105             | 0.64           | 0.215               | 0.135           |
|      |              | 80-84             | 11.6                       | 0.0099             | 0.72           | 0.161               | 0.135           |
|      |              | 85-89             | 13.5                       | 0.0127             | 0.49           | 0.227               | 0.135           |
|      |              | 90-94             | 14.3                       | 0.0151             | 0.48           | 0.286               | 0.135           |
|      |              | 95+               | 14.6                       | 0.0137             | 0.57           | 0.259               | 0.135           |



|        |           |       |      |        |      |       |       |
|--------|-----------|-------|------|--------|------|-------|-------|
| Female | Māori     | 0-4   | 0.0  | 0.0000 | 0.00 | 0.000 | 0.169 |
|        |           | 5-9   | 0.0  | 0.0000 | 0.00 | 0.000 | 0.169 |
|        |           | 10-14 | 0.0  | 0.0000 | 0.00 | 0.001 | 0.169 |
|        |           | 15-19 | 1.5  | 0.0000 | 0.00 | 0.033 | 0.169 |
|        |           | 20-24 | 3.8  | 0.0000 | 0.00 | 0.172 | 0.169 |
|        |           | 25-29 | 4.9  | 0.0000 | 0.05 | 0.354 | 0.169 |
|        |           | 30-34 | 10.6 | 0.0000 | 0.22 | 0.444 | 0.169 |
|        |           | 35-39 | 14.7 | 0.0001 | 0.28 | 0.479 | 0.169 |
|        |           | 40-44 | 17.1 | 0.0011 | 0.25 | 0.584 | 0.169 |
|        |           | 45-49 | 19.4 | 0.0063 | 0.24 | 0.702 | 0.169 |
|        |           | 50-54 | 22.3 | 0.0138 | 0.25 | 0.783 | 0.169 |
|        |           | 55-59 | 24.5 | 0.0150 | 0.26 | 0.846 | 0.169 |
|        |           | 60-64 | 24.5 | 0.0094 | 0.28 | 0.874 | 0.169 |
|        |           | 65-69 | 25.7 | 0.0100 | 0.38 | 0.752 | 0.145 |
|        |           | 70-74 | 26.3 | 0.0105 | 0.43 | 0.625 | 0.145 |
|        |           | 75-79 | 24.5 | 0.0089 | 0.55 | 0.521 | 0.145 |
|        |           | 80-84 | 23.1 | 0.0188 | 0.80 | 0.321 | 0.145 |
|        |           | 85-89 | 25.6 | 0.0399 | 0.91 | 0.271 | 0.145 |
|        |           | 90-94 | 27.0 | 0.0429 | 1.05 | 0.252 | 0.145 |
|        |           | 95+   | 27.6 | 0.0342 | 1.27 | 0.217 | 0.145 |
| Male   | non-Māori | 0-4   | 0.0  | 0.0000 | 0.00 | 0.000 | 0.137 |
|        |           | 5-9   | 0.0  | 0.0000 | 0.00 | 0.000 | 0.137 |
|        |           | 10-14 | 0.0  | 0.0001 | 0.00 | 0.000 | 0.137 |
|        |           | 15-19 | 0.4  | 0.0000 | 0.00 | 0.009 | 0.137 |
|        |           | 20-24 | 1.0  | 0.0000 | 0.00 | 0.044 | 0.137 |
|        |           | 25-29 | 1.1  | 0.0000 | 0.03 | 0.090 | 0.137 |
|        |           | 30-34 | 1.7  | 0.0000 | 0.13 | 0.113 | 0.137 |
|        |           | 35-39 | 2.4  | 0.0001 | 0.17 | 0.122 | 0.137 |
|        |           | 40-44 | 3.0  | 0.0009 | 0.16 | 0.147 | 0.137 |
|        |           | 45-49 | 3.6  | 0.0053 | 0.16 | 0.177 | 0.121 |
|        |           | 50-54 | 4.3  | 0.0113 | 0.19 | 0.200 | 0.121 |
|        |           | 55-59 | 5.2  | 0.0119 | 0.21 | 0.218 | 0.121 |
|        |           | 60-64 | 6.0  | 0.0079 | 0.27 | 0.224 | 0.121 |
|        |           | 65-69 | 6.7  | 0.0098 | 0.38 | 0.193 | 0.207 |
|        |           | 70-74 | 6.9  | 0.0109 | 0.43 | 0.161 | 0.207 |
|        |           | 75-79 | 6.4  | 0.0095 | 0.57 | 0.132 | 0.186 |
|        |           | 80-84 | 5.9  | 0.0072 | 0.86 | 0.078 | 0.186 |
|        |           | 85-89 | 6.2  | 0.0017 | 1.06 | 0.059 | 0.186 |
|        |           | 90-94 | 6.5  | 0.0001 | 1.16 | 0.056 | 0.186 |
|        |           | 95+   | 6.6  | 0.0001 | 1.29 | 0.052 | 0.186 |
| Female | non-Māori | 0-4   | 0.0  | 0.0000 | 0.00 | 0.000 | 0.229 |
|        |           | 5-9   | 0.0  | 0.0000 | 0.00 | 0.000 | 0.229 |
|        |           | 10-14 | 0.0  | 0.0000 | 0.00 | 0.000 | 0.229 |
|        |           | 15-19 | 0.9  | 0.0000 | 0.00 | 0.021 | 0.229 |
|        |           | 20-24 | 2.1  | 0.0000 | 0.00 | 0.102 | 0.229 |
|        |           | 25-29 | 2.5  | 0.0000 | 0.06 | 0.191 | 0.229 |
|        |           | 30-34 | 7.9  | 0.0000 | 0.26 | 0.255 | 0.229 |
|        |           | 35-39 | 11.0 | 0.0001 | 0.33 | 0.299 | 0.229 |
|        |           | 40-44 | 11.9 | 0.0007 | 0.30 | 0.353 | 0.229 |
|        |           | 45-49 | 12.5 | 0.0040 | 0.28 | 0.411 | 0.155 |
|        |           | 50-54 | 13.6 | 0.0078 | 0.28 | 0.449 | 0.155 |
|        |           | 55-59 | 14.7 | 0.0069 | 0.30 | 0.468 | 0.155 |
|        |           | 60-64 | 13.6 | 0.0047 | 0.27 | 0.493 | 0.155 |
|        |           | 65-69 | 12.8 | 0.0049 | 0.31 | 0.462 | 0.122 |
|        |           | 70-74 | 12.5 | 0.0051 | 0.32 | 0.402 | 0.122 |
|        |           | 75-79 | 10.0 | 0.0047 | 0.33 | 0.358 | 0.145 |
|        |           | 80-84 | 7.4  | 0.0075 | 0.46 | 0.222 | 0.145 |

|  |       |      |        |      |       |       |
|--|-------|------|--------|------|-------|-------|
|  | 85-89 | 9.7  | 0.0134 | 0.60 | 0.162 | 0.145 |
|  | 90-94 | 10.4 | 0.0156 | 0.65 | 0.157 | 0.145 |
|  | 95+   | 9.9  | 0.0156 | 0.69 | 0.143 | 0.145 |

Table S17. COPD input parameters

| Sex    | Ethnic group | Age group (years) | Incidence rate per 100,000 | Case-fatality rate | Prevalence per 1000 | Disability rate |
|--------|--------------|-------------------|----------------------------|--------------------|---------------------|-----------------|
| Male   | Māori        | 0-4               | 0.0                        | 0.0000             | 0.0                 | 0.125           |
|        |              | 5-9               | 0.0                        | 0.0000             | 0.0                 | 0.125           |
|        |              | 10-14             | 0.0                        | 0.0000             | 0.0                 | 0.125           |
|        |              | 15-19             | 45.2                       | 0.0000             | 2.9                 | 0.125           |
|        |              | 20-24             | 74.1                       | 0.0000             | 5.9                 | 0.125           |
|        |              | 25-29             | 99.3                       | 0.0002             | 10.3                | 0.125           |
|        |              | 30-34             | 107.1                      | 0.0012             | 15.4                | 0.125           |
|        |              | 35-39             | 160.1                      | 0.0020             | 21.7                | 0.125           |
|        |              | 40-44             | 206.7                      | 0.0019             | 30.8                | 0.125           |
|        |              | 45-49             | 320.1                      | 0.0015             | 43.1                | 0.083           |
|        |              | 50-54             | 528.7                      | 0.0019             | 64.0                | 0.083           |
|        |              | 55-59             | 696.8                      | 0.0038             | 93.8                | 0.091           |
|        |              | 60-64             | 832.2                      | 0.0074             | 129.3               | 0.091           |
|        |              | 65-69             | 1008.7                     | 0.0110             | 169.3               | 0.100           |
|        |              | 70-74             | 1157.4                     | 0.0176             | 213.0               | 0.100           |
|        |              | 75-79             | 1196.9                     | 0.0259             | 252.6               | 0.097           |
|        |              | 80-84             | 1164.2                     | 0.0322             | 282.7               | 0.097           |
|        |              | 85-89             | 1136.9                     | 0.0394             | 303.8               | 0.087           |
|        |              | 90-94             | 1054.3                     | 0.0540             | 309.9               | 0.087           |
| 95+    | 960.7        | 0.0791            | 293.4                      | 0.087              |                     |                 |
| Female | Māori        | 0-4               | 0.0                        | 0.0000             | 0.0                 | 0.224           |
|        |              | 5-9               | 0.0                        | 0.0000             | 0.0                 | 0.224           |
|        |              | 10-14             | 0.0                        | 0.0000             | 0.0                 | 0.224           |
|        |              | 15-19             | 30.1                       | 0.0000             | 2.2                 | 0.224           |
|        |              | 20-24             | 51.3                       | 0.0005             | 4.2                 | 0.224           |
|        |              | 25-29             | 82.0                       | 0.0015             | 7.5                 | 0.224           |
|        |              | 30-34             | 123.4                      | 0.0018             | 12.5                | 0.224           |
|        |              | 35-39             | 181.6                      | 0.0016             | 19.9                | 0.224           |
|        |              | 40-44             | 249.7                      | 0.0018             | 30.5                | 0.224           |
|        |              | 45-49             | 344.9                      | 0.0022             | 44.8                | 0.160           |
|        |              | 50-54             | 458.4                      | 0.0027             | 64.4                | 0.160           |
|        |              | 55-59             | 553.5                      | 0.0053             | 88.4                | 0.167           |
|        |              | 60-64             | 664.4                      | 0.0111             | 115.0               | 0.167           |
|        |              | 65-69             | 766.5                      | 0.0159             | 143.2               | 0.170           |
|        |              | 70-74             | 839.4                      | 0.0225             | 171.0               | 0.170           |
|        |              | 75-79             | 873.6                      | 0.0290             | 194.2               | 0.149           |
|        |              | 80-84             | 868.7                      | 0.0306             | 213.3               | 0.149           |
|        |              | 85-89             | 830.5                      | 0.0289             | 230.1               | 0.113           |
|        |              | 90-94             | 765.5                      | 0.0267             | 244.9               | 0.113           |
| 95+    | 690.0        | 0.0246            | 257.1                      | 0.113              |                     |                 |
| Male   | non-Māori    | 0-4               | 0.0                        | 0.0000             | 0.0                 | 0.117           |
|        |              | 5-9               | 0.0                        | 0.0000             | 0.0                 | 0.117           |
|        |              | 10-14             | 0.0                        | 0.0000             | 0.0                 | 0.117           |
|        |              | 15-19             | 35.2                       | 0.0000             | 1.7                 | 0.117           |
|        |              | 20-24             | 66.1                       | 0.0000             | 4.4                 | 0.117           |
|        |              | 25-29             | 61.6                       | 0.0000             | 7.7                 | 0.117           |
|        |              | 30-34             | 49.2                       | 0.0001             | 10.4                | 0.117           |

|        |           |       |        |        |       |       |
|--------|-----------|-------|--------|--------|-------|-------|
|        |           | 35-39 | 67.1   | 0.0002 | 13.2  | 0.117 |
|        |           | 40-44 | 84.2   | 0.0003 | 17.0  | 0.117 |
|        |           | 45-49 | 136.4  | 0.0005 | 22.2  | 0.083 |
|        |           | 50-54 | 235.5  | 0.0008 | 31.5  | 0.083 |
|        |           | 55-59 | 304.8  | 0.0018 | 44.9  | 0.084 |
|        |           | 60-64 | 380.3  | 0.0039 | 60.9  | 0.084 |
|        |           | 65-69 | 658.7  | 0.0063 | 84.3  | 0.096 |
|        |           | 70-74 | 906.8  | 0.0101 | 120.4 | 0.096 |
|        |           | 75-79 | 1030.2 | 0.0156 | 161.3 | 0.095 |
|        |           | 80-84 | 1054.2 | 0.0228 | 200.0 | 0.095 |
|        |           | 85-89 | 954.5  | 0.0333 | 227.1 | 0.095 |
|        |           | 90-94 | 847.6  | 0.0480 | 236.3 | 0.095 |
|        |           | 95+   | 755.9  | 0.0720 | 225.6 | 0.095 |
| Female | non-Māori | 0-4   | 0.0    | 0.0000 | 0.0   | 0.217 |
|        |           | 5-9   | 0.0    | 0.0000 | 0.0   | 0.217 |
|        |           | 10-14 | 0.0    | 0.0000 | 0.0   | 0.217 |
|        |           | 15-19 | 17.6   | 0.0000 | 1.2   | 0.217 |
|        |           | 20-24 | 33.2   | 0.0000 | 2.5   | 0.217 |
|        |           | 25-29 | 53.8   | 0.0000 | 4.6   | 0.217 |
|        |           | 30-34 | 81.6   | 0.0001 | 8.0   | 0.217 |
|        |           | 35-39 | 116.8  | 0.0002 | 12.9  | 0.217 |
|        |           | 40-44 | 159.9  | 0.0003 | 19.8  | 0.217 |
|        |           | 45-49 | 214.6  | 0.0005 | 29.0  | 0.119 |
|        |           | 50-54 | 277.7  | 0.0008 | 41.2  | 0.119 |
|        |           | 55-59 | 340.9  | 0.0018 | 56.4  | 0.116 |
|        |           | 60-64 | 408.8  | 0.0035 | 74.3  | 0.116 |
|        |           | 65-69 | 474.3  | 0.0054 | 94.7  | 0.122 |
|        |           | 70-74 | 526.3  | 0.0087 | 116.5 | 0.122 |
|        |           | 75-79 | 555.2  | 0.0132 | 137.6 | 0.127 |
|        |           | 80-84 | 558.3  | 0.0178 | 155.8 | 0.127 |
|        |           | 85-89 | 536.7  | 0.0238 | 169.3 | 0.117 |
|        |           | 90-94 | 496.1  | 0.0333 | 175.0 | 0.117 |
|        |           | 95+   | 450.2  | 0.0484 | 170.7 | 0.117 |

Table S18. LRTI input parameters

| Sex   | Ethnic group | Age group (years) | Mortality per 100,000 | Disability rate |
|-------|--------------|-------------------|-----------------------|-----------------|
| Male  | Māori        | 0-4               | 11.86                 | 0.00064         |
|       |              | 5-9               | 0.00                  | 0.00018         |
|       |              | 10-14             | 0.00                  | 0.00019         |
|       |              | 15-19             | 0.00                  | 0.00018         |
|       |              | 20-24             | 0.00                  | 0.00024         |
|       |              | 25-29             | 0.00                  | 0.00031         |
|       |              | 30-34             | 0.00                  | 0.00023         |
|       |              | 35-39             | 0.00                  | 0.00030         |
|       |              | 40-44             | 1.99                  | 0.00028         |
|       |              | 45-49             | 0.00                  | 0.00025         |
|       |              | 50-54             | 15.47                 | 0.00035         |
|       |              | 55-59             | 6.63                  | 0.00046         |
|       |              | 60-64             | 0.00                  | 0.00045         |
|       |              | 65-69             | 0.00                  | 0.00064         |
|       |              | 70-74             | 19.97                 | 0.00077         |
|       |              | 75-79             | 74.44                 | 0.00092         |
| 80-84 | 174.66       | 0.00116           |                       |                 |

|        |           |       |        |         |
|--------|-----------|-------|--------|---------|
|        |           | 85-89 | 312.50 | 0.00146 |
|        |           | 90-94 | 312.50 | 0.00146 |
|        |           | 95+   | 312.50 | 0.00146 |
| Female | Māori     | 0-4   | 12.35  | 0.00059 |
|        |           | 5-9   | 0.00   | 0.00022 |
|        |           | 10-14 | 0.00   | 0.00008 |
|        |           | 15-19 | 0.00   | 0.00027 |
|        |           | 20-24 | 0.00   | 0.00030 |
|        |           | 25-29 | 0.00   | 0.00032 |
|        |           | 30-34 | 0.00   | 0.00029 |
|        |           | 35-39 | 0.00   | 0.00030 |
|        |           | 40-44 | 1.58   | 0.00031 |
|        |           | 45-49 | 1.80   | 0.00033 |
|        |           | 50-54 | 2.41   | 0.00044 |
|        |           | 55-59 | 0.00   | 0.00053 |
|        |           | 60-64 | 4.56   | 0.00060 |
|        |           | 65-69 | 0.00   | 0.00078 |
|        |           | 70-74 | 8.80   | 0.00063 |
|        |           | 75-79 | 83.68  | 0.00077 |
|        |           | 80-84 | 108.75 | 0.00083 |
|        |           | 85-89 | 542.45 | 0.00095 |
|        |           | 90-94 | 542.45 | 0.00095 |
|        |           | 95+   | 542.45 | 0.00095 |
| Male   | non-Māori | 0-4   | 3.69   | 0.00032 |
|        |           | 5-9   | 0.30   | 0.00009 |
|        |           | 10-14 | 0.54   | 0.00009 |
|        |           | 15-19 | 0.00   | 0.00009 |
|        |           | 20-24 | 0.00   | 0.00012 |
|        |           | 25-29 | 0.00   | 0.00016 |
|        |           | 30-34 | 0.00   | 0.00012 |
|        |           | 35-39 | 0.29   | 0.00015 |
|        |           | 40-44 | 0.00   | 0.00014 |
|        |           | 45-49 | 0.25   | 0.00013 |
|        |           | 50-54 | 1.72   | 0.00018 |
|        |           | 55-59 | 2.02   | 0.00024 |
|        |           | 60-64 | 2.06   | 0.00024 |
|        |           | 65-69 | 4.28   | 0.00035 |
|        |           | 70-74 | 11.13  | 0.00042 |
|        |           | 75-79 | 26.31  | 0.00052 |
|        |           | 80-84 | 105.42 | 0.00066 |
|        |           | 85-89 | 474.57 | 0.00088 |
|        |           | 90-94 | 474.57 | 0.00088 |
|        |           | 95+   | 474.57 | 0.00088 |
| Female | non-Māori | 0-4   | 1.31   | 0.00026 |
|        |           | 5-9   | 0.00   | 0.00010 |
|        |           | 10-14 | 0.00   | 0.00004 |
|        |           | 15-19 | 0.00   | 0.00012 |
|        |           | 20-24 | 0.00   | 0.00013 |
|        |           | 25-29 | 0.00   | 0.00014 |
|        |           | 30-34 | 0.00   | 0.00013 |
|        |           | 35-39 | 0.00   | 0.00014 |
|        |           | 40-44 | 0.46   | 0.00014 |
|        |           | 45-49 | 0.24   | 0.00015 |
|        |           | 50-54 | 1.67   | 0.00020 |
|        |           | 55-59 | 2.09   | 0.00025 |
|        |           | 60-64 | 1.17   | 0.00028 |
|        |           | 65-69 | 3.68   | 0.00037 |

|       |        |         |
|-------|--------|---------|
| 70-74 | 8.72   | 0.00030 |
| 75-79 | 20.07  | 0.00038 |
| 80-84 | 92.26  | 0.00040 |
| 85-89 | 558.75 | 0.00046 |
| 90-94 | 558.75 | 0.00046 |
| 95+   | 558.75 | 0.00046 |

Table S19. Future APC trends in incidence, CFR and remission

|                    | Incidence Trends |        |        |        | Case-Fatality Trends |        |        |        | Remission Trends |        |        |        |
|--------------------|------------------|--------|--------|--------|----------------------|--------|--------|--------|------------------|--------|--------|--------|
|                    | Non-Māori        |        | Māori  |        | Non-Māori            |        | Māori  |        | Non-Māori        |        | Māori  |        |
|                    | Men              | Woman  | Men    | Woman  | Men                  | Woman  | Men    | Woman  | Men              | Woman  | Men    | Woman  |
| CHD                | -2.00%           | -2.00% | -2.00% | -2.00% | -2.00%               | -2.00% | -2.00% | -2.00% |                  |        |        |        |
| Stroke             | -2.00%           | -2.00% | -2.00% | -2.00% | -2.00%               | -2.00% | -2.00% | -2.00% |                  |        |        |        |
| COPD               | -1.00%           | -1.00% | -1.00% | -1.00% | -1.00%               | -1.00% | -1.00% | -1.00% |                  |        |        |        |
| LRTI               |                  |        |        |        |                      |        |        |        |                  |        |        |        |
| Bladder Cancer     | 0.10%            | 1.00%  | 0.10%  | 0.90%  | 4.20%                | 4.49%  | 3.00%  | 2.47%  | -2.40%           | -1.77% | -5.38% | -7.04% |
| Head & Neck Cancer | -1.80%           | -0.30% | 0.80%  | 2.40%  | -1.26%               | -1.55% | -1.28% | -1.33% | 1.93%            | 1.13%  | 1.87%  | 1.72%  |
| Esophageal Cancer  | 0.10%            | -0.60% | 0.10%  | -0.70% | -0.32%               | -0.23% | -0.29% | -0.14% | 1.98%            | 2.47%  | 2.12%  | 3.18%  |
| Liver Cancer       | 1.90%            | 1.60%  | -0.10% | -0.30% | -0.71%               | -0.86% | -0.77% | -0.76% | 4.30%            | 3.64%  | 4.04%  | 4.06%  |
| Cervical Cancer    |                  | -2.40% |        | -3.50% |                      | -0.31% |        | -0.28% |                  | 0.20%  |        | 0.26%  |
| Endometrial Cancer |                  | 0.50%  |        | 0.40%  |                      | -1.91% |        | -1.85% |                  | 0.73%  |        | 0.88%  |
| Kidney Cancer      | 1.30%            | 1.50%  | 1.30%  | 1.50%  | -1.83%               | -1.83% | -1.64% | -1.56% | 0.93%            | 0.93%  | 1.39%  | 1.61%  |
| Leukemia           | 1.90%            | 1.50%  | 1.80%  | 1.40%  | -3.50%               | -2.51% | -2.90% | -1.76% | 1.37%            | 4.04%  | 2.91%  | 6.75%  |
| Lung Cancer        | -3.80%           | -0.40% | -2.90% | 0.50%  | 0.02%                | 0.02%  | 0.02%  | 0.02%  | -0.24%           | -0.24% | -0.29% | -0.25% |
| Melanoma           | 1.90%            | 1.60%  | 1.90%  | 1.60%  |                      |        |        |        |                  |        |        |        |
| Pancreas Cancer    | -1.80%           | -1.40% | -1.80% | -1.40% | -0.03%               | -0.02% | -0.02% | -0.01% | 0.23%            | 0.30%  | 0.28%  | 0.33%  |
| Stomach Cancer     | -1.50%           | -1.40% | -0.50% | -0.50% | -0.48%               | -0.45% | -0.36% | -0.37% | 1.04%            | 1.14%  | 1.47%  | 1.42%  |
| Thyroid Cancer     | 1.90%            | 3.70%  | 1.90%  | 3.70%  | -2.60%               | -2.61% | -2.60% | -2.60% | 0.05%            | 0.04%  | 0.07%  | 0.06%  |

## Appendix C: Association of smoking and vaping with disease incidence rates

### Health impact of changing exposure to tobacco smoke

We modelled the health benefits of interventions through a reduction in incidence of each smoking-related disease (Equation 1). Note that all calculations were done by age, gender and ethnicity, although we omit these subscripts from the following equations for clarity.

$$I_x' = I_x \times (1 - \text{PIF}_x) \quad (1)$$

where:

$I_x$  is the current incidence of disease  $x$  in the population;

$I_x'$  is the new incidence of disease  $x$  after an intervention is implemented; and

$\text{PIF}_x$  is the population impact fraction for disease  $x$ .

Each  $\text{PIF}_x$ <sup>9</sup> was derived from the current smoking prevalence, the new smoking prevalence following intervention and the relative risks of smoking-related diseases (Equation 2).

$$\text{PIF}_x = \frac{\left[ p_n + p_c \text{RR}_{xc} + \sum_{t=0}^{100} p(t)_f \text{RR}_{xf}(t) \right] - \left[ p'_n + p'_c \text{RR}_{xc} + \sum_{t=0}^{100} p'(t)_f \text{RR}_{xf}(t) \right]}{\left[ p_n + p_c \text{RR}_{xc} + \sum_{t=0}^{100} p(t)_f \text{RR}_{xf}(t) \right]} \quad (2)$$

where:

$\text{RR}_{xc}$  is the risk of disease  $x$  in current smokers, relative to never smokers;

$\text{RR}_{xf}(t)$  is the risk of disease  $x$  among former smokers at time  $t$  since cessation, relative to never smokers;

$p_c$  and  $p'_c$  are the prevalence of people who report currently smoking at least one cigarette daily, before and after intervention;

$p_n$  and  $p'_n$  are the prevalence of prevalence of people who report never having smoked at least one cigarette daily, before and after intervention; and

$p_f$  and  $p'_f$  are the prevalence of prevalence of people who report past smoking of at least one cigarette daily, before and after intervention.

### Relative risks of smoking-related diseases

We applied risks of smoking-related disease from New Zealand-specific epidemiological studies where possible. Unlike the large cohort studies, such as the US based Cancer Prevention Study II (CPS II), the New Zealand studies<sup>7,10,11</sup> make use of national cancer registry (and mortality) data linked with data from the regular censuses, which have episodically included questions on smoking behaviour since 1976. For risks of chronic obstructive pulmonary disease and lower respiratory tract infections, however, we had to

draw on international studies <sup>12</sup>. Table S20 gives a summary of all the relative risk values used in the modeling and their sources.

Table S20. Relative risks of smoking-related diseases for current versus never smokers

| Disease                               | Relative risk (95% uncertainty interval)                   | Confounding adjustment* | Source                                |
|---------------------------------------|------------------------------------------------------------|-------------------------|---------------------------------------|
| Coronary heart disease                | Men: 1.61 (1.44 to 1.80)<br>Women: 1.66 (1.27 to 2.17)     |                         | New Zealand linked data <sup>11</sup> |
| Stroke                                | Men: 2.52 (2.12 to 2.99)<br>Women: 2.20 (1.66 to 2.90)     |                         | New Zealand linked data <sup>11</sup> |
| Chronic obstructive pulmonary disease | Men: 10.80 (8.40 to 13.90)<br>Women: 12.30 (9.90 to 15.20) |                         | CPS-II <sup>12</sup>                  |
| Lower respiratory tract infection     | Men: 1.90 (1.50 to 2.40)<br>Women: 2.20 (1.70 to 2.80)     |                         | CPS-II <sup>12</sup>                  |
| Lung cancer                           | 9.28 (8.31 to 10.40)**                                     |                         | New Zealand linked data <sup>7</sup>  |
| Mouth and oropharyngeal cancer        | 2.30 (1.94 to 2.72) **                                     |                         | New Zealand linked data <sup>7</sup>  |
| Esophageal cancer                     | 2.14 (1.73 to 2.65) **                                     | -0.4 to -0.1            | New Zealand linked data <sup>7</sup>  |
| Pancreatic cancer                     | 1.68 (1.44 to 1.96) **                                     | 0.1 to 0.2              | New Zealand linked data <sup>7</sup>  |
| Bladder cancer                        | 2.22 (1.94 to 2.55) **                                     |                         | New Zealand linked data <sup>7</sup>  |
| Kidney cancer                         | 1.29 (1.07 to 1.56) **                                     |                         | New Zealand linked data <sup>7</sup>  |
| Stomach cancer                        | 1.42 (1.22 to 1.66) **                                     | 0.07 to 0.10            | New Zealand linked data <sup>7</sup>  |
| Liver cancer                          | 1.75 (1.37 to 2.24) **                                     | -0.10 to -0.20          | New Zealand linked data <sup>7</sup>  |
| Cervical cancer                       | 1.82 (1.51 to 2.20) **                                     |                         | New Zealand linked data <sup>7</sup>  |
| Endometrial cancer#                   | 0.67 (0.56 to 0.79) **                                     | 0.08                    | New Zealand linked data <sup>7</sup>  |
| Melanoma#                             | 0.62 (0.56 to 0.69) **                                     |                         | New Zealand linked data <sup>7</sup>  |
| Thyroid cancer#                       | 0.76 (0.58 to 1.00) **                                     |                         | New Zealand linked data <sup>7</sup>  |

\* Additional change in RR to additionally correct for potential residual confounding by alcohol and obesity (which were not captured in census data).

\*\*Rate ratio values adjusted for selection bias and confounding (e.g. due to socio-economic factors) and exposure misclassification.

# That is, there is some evidence that tobacco smoking protects against these cancers (possibly due to hormonal effects)

(Note that we did include a scenario analysis substituting the CPS II relative risks for CHD and stroke for the ‘default’ relative risks above.)



We assumed no excess risk of lower respiratory tract infection immediately after cessation of smoking, but for all other diseases, we assumed that the current smoker disease risks decline with time since cessation, using regression models derived by Hoogenveen et al.<sup>13</sup> The regression model parameters are shown in Table S21. We assumed no excess risk remained after 20 years.

$$RR_{xf}(t) = 1 + (RR_{xc} - 1) \exp[-\gamma t] \quad RR_{xf}(t) = 1 + (RR_{xc} - 1) \exp[-\gamma t] \quad (1)$$

$$\gamma = \gamma_0 \exp[-\eta(a - 50)] \quad \gamma = \gamma_0 \exp[-\eta(a - 50)] \quad (2)$$

where:

$\gamma$  is a regression coefficient for time ( $t$ );

$\gamma_0$  is the regression coefficient value at age 50 (minimum observed age of age gradient<sup>13</sup>);

and

$\eta$  is a regression coefficient for age ( $a$ );

Table S21. Regression coefficients used to estimate declining risks of disease with smoking cessation

| Disease                                             | $\gamma_0$ | $\eta$  |
|-----------------------------------------------------|------------|---------|
| Coronary heart disease <sup>13</sup>                | 0.24228    | 0.05822 |
| Stroke <sup>13</sup>                                | 0.31947    | 0.01648 |
| Chronic obstructive pulmonary disease <sup>13</sup> | 0.20333    | 0.03087 |
| <b>Cancers</b>                                      |            |         |
| Lung cancer <sup>13</sup>                           | 0.15637    | 0.02065 |
| Mouth and oropharyngeal cancer <sup>13</sup>        | 0.0493028  | 0       |
| Esophageal cancer <sup>13</sup>                     | 0.0537424  | 0       |
| Pancreatic cancer <sup>13</sup>                     | 0.09279    | 0       |
| Bladder cancer <sup>13</sup>                        | 0.05417    | 0       |
| Kidney cancer <sup>13</sup>                         | 0.0385957  | 0       |
| Stomach cancer <sup>13</sup>                        | 0.0264112  | 0       |
| Liver cancer*                                       | 0.0525     | 0       |
| Cervical cancer*                                    | 0.0525     | 0       |
| Endometrial cancer* #                               | 0.0525     | 0       |
| Melanoma* #                                         | 0.0525     | 0       |
| Thyroid cancer* #                                   | 0.0525     | 0       |

\* Estimated as average of all other cancers, excluding lung cancer.

# For these diseases it is the decline in time of the protective effect – back to zero.

## Appendix D: Expert knowledge elicitation process

There is no firm evidence on the amount by which smoking prevalence will reduce – as a result of quitting – with denicotinising tobacco. On the one hand, given nicotine is the addictive component there is reason to believe the vast majority of smokers will quit if only tobacco with sub-addictive levels of nicotine is available. This optimistic stance is further strengthened by possible positive reinforcement of denormalisation and suppliers exiting the market. On the other hand, some smokers maintain they will smoke regardless of nicotine, and for many smoking is a socially conditioned habit as well as a biological addiction. To parameterise our model, many of the co-authors of this paper were asked to independently estimate the most likely percentage reduction in smokers after five to ten-years compared to ongoing BAU trends with not denicotinisation. And to estimate a pessimistic and optimistic percentage reduction in smoking (that we interpreted as each individual's 95% range of likely values). Table S22 shows the separate estimates, resulting in an average of 84.8% reduction as the most likely estimate, and average pessimistic and optimistic scenarios of 65.8% and 96.6%, respectively (equating to an approximated SD of 7.84%). Specifying this a Beta distribution (17.8, 3.2) gave a mean of 84.8%, median of 85.9%, 2.5<sup>th</sup> percentile of 67.0% and 97.5<sup>th</sup> percentile of 96.3%. Figure S2 below gives the probability density function).

Table S22. Co-authors estimates of the effect of denicotinisation on smoking prevalence

| Co-authors | Pessimistic | Most likely | Optimistic |
|------------|-------------|-------------|------------|
| RE         | 50%         | 80%         | 95%        |
| RM         | 50%         | 78.50%      | 95%        |
| AW         | 80%         | 95%         | 99%        |
| DAO        | 75%         | 85%         | 98%        |
| TB         | 80%         | 90%         | 97.50%     |
| NW         | 60%         | 80%         | 95%        |
|            |             |             |            |
| Average    | 65.8%       | 84.8%       | 96.6%      |

Figure S2. Probability density function applied to average effect of denicotinisation on smoking cessation

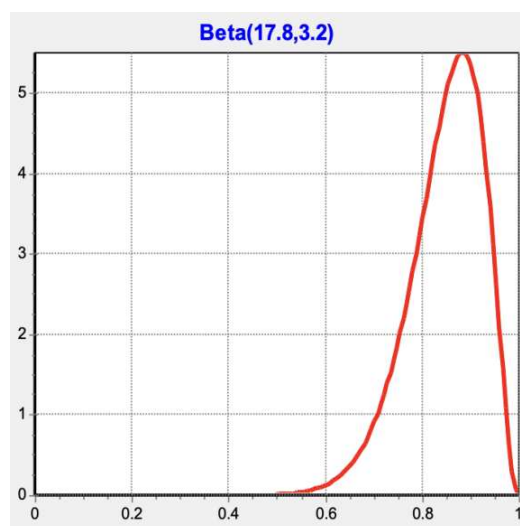

It is interesting to compare our expert elicitation results with those done by the US Food and Drug Administration expert elicitation process, conducted in 2015 and published in the *New England Journal of Medicine*.<sup>14</sup> It is important to note the key contextual differences with our process: our elicitation was undertaken in 2022; Aotearoa NZ is a country with strong border controls and ocean borders that limit potential illicit supply; Aotearoa NZ has liberal access to vaping as both an additional cessation support and substitute for those unwilling to or unable to quit nicotine altogether. Compared to Apelberg et al (2018), our experts' estimates were more similar than the (surprisingly) large heterogeneity among experts in Apelberg et al. The Apelberg et al.'s expert median estimates of quitting in the first year ranged from 4.5% to 55%, and annual quitting in subsequent years ranged from 4.5% to 80% (table below). Calculating what this implies as the quitting after five years, it ranges from 20.6% to 99.9% (average across experts 77.2%). Our experts ranged from 78.5% to 95% in their 'most likely' estimates of quitting after five years and ranged from 65.8% to 96.6% for the average of their pessimist and optimistic estimates. In summary, our experts estimate somewhat higher quitting after five years than the Apelberg et al. experts – a difference that we believe is plausible due to the strengthened evidence base and the unique circumstances of Aotearoa NZ, but nevertheless must be noted as higher than that in Apelberg et al.

| Apelberg et al experts.                                       | A     | B     | C     | D     | E     | F     | G     | H     | Average of experts |
|---------------------------------------------------------------|-------|-------|-------|-------|-------|-------|-------|-------|--------------------|
| a. Median percentage quitting in first year                   | 20%   | 55%   | 20%   | 50%   | 9%    | 10%   | 4.5%  | 30%   | 25%                |
| b. Median percentage quitting in subsequent years             | 13.5% | 80%   | 10%   | 30%   | 15%   | 8%    | 4.5%  | 15%   | 22%                |
| Implied quitting over five years = $1 - (1-a) \times (1-b)^4$ | 55.2% | 99.9% | 47.5% | 88.0% | 52.5% | 35.5% | 20.6% | 63.5% | 72.2%              |

Regarding reduced initiation of tobacco smoking, the Apelberg et al experts had an average of a 46% (range 21% to 75%) reduction in initiation in the first year and an average of a 49% (range 21% to 70%) reduction in initiation in subsequent years. Our experts (not by

independent elicitation as above for cessation, but rather a group discussion) settled on 10% of the BAU initiation by five years post implementation (95% UI 2.6% to 21.5%). As modelled, this was a 37%, 60%, 75%, 84% and 90% reduction in initiation compared with BAU by year post implementation, then held constant at 90% from year five onwards. Our estimate of reduced initiation is considerably greater than Apelberg et al – even our lower limit of reduction of 78.5% (i.e., 1 – 21.5%) is above the average of Apelberg et al.'s experts 95<sup>th</sup> percentile estimates of 71% (range 45% to 95% across experts). We attribute the higher estimates in the Aotearoa-NZ context to the ready access to vaping as a substitute, the strong border controls that should limit illicit supply, and the dramatic falls in young adult smoking prevalence in recent years in Aotearoa-NZ that gives more confidence in major reductions in initiation from mandatory denicotinisation of retail tobacco.

Returning to the increase in cessation, we operationalised it in the model by randomly drawing from the Beta distribution (17.8, 3.2). Assume the mean of 84.8% was drawn. We applied the following additional net cessation rate in the first five annual cycles of  $1 - (1 - 84.8\%)^{1/5} = 31.3\%$ . That is, after five cycles the 'survivorship' will be  $1 - (1 - 31.3\%)^5 = 15.3\%$  (which is  $1 - 84.8\%$ ). Given that this reduction was compared to future BAU, the percentage impact on the net cessation rate (NCR) was on that after the BAU NCR. For example, if BAU NCR in the next cycle was 5%, then under denicotinisation it would become  $5\% + (1 - 5\%) \cdot 31.3\% = 34.8\%$ .

This additional intervention NCR for denicotinisation was applied for the first 5 cycles, then the NCR was set at twice the BAU NCR.

Table S23. Estimated smoking prevalence (20+ year olds) in Aotearoa/New Zealand by policy scenario for 2020, 2025, 2030, and 2040 by sex and ethnic group

| Policy                 | Population group | 2020       |                  | 2025       |                  | 2030       |                  | 2035       |                  | 2040       |                  |
|------------------------|------------------|------------|------------------|------------|------------------|------------|------------------|------------|------------------|------------|------------------|
|                        |                  | Prevalence | 95% UI           |
| Business as usual      | Māori Female     | 37.1%      | (37.1% to 37.1%) | 32.3%      | (28.9% to 34.0%) | 27.9%      | (22.3% to 31.0%) | 23.9%      | (17.1% to 28.1%) | 20.2%      | (12.9% to 25.4%) |
|                        | non-Māori Female | 11.8%      | (11.8% to 11.8%) | 10.1%      | (9.0% to 10.6%)  | 8.5%       | (6.8% to 9.4%)   | 7.1%       | (5.1% to 8.3%)   | 5.9%       | (3.8% to 7.4%)   |
|                        | Māori Male       | 30.6%      | (30.6% to 30.6%) | 24.9%      | (21.9% to 26.6%) | 20.2%      | (15.6% to 23.1%) | 16.2%      | (11.1% to 20.0%) | 12.9%      | (7.8% to 17.2%)  |
|                        | non-Māori Male   | 13.1%      | (13.1% to 13.1%) | 11.5%      | (10.2% to 11.8%) | 9.9%       | (7.9% to 10.6%)  | 8.4%       | (6.1% to 9.5%)   | 7.1%       | (4.7% to 8.5%)   |
|                        | All              | 15.4%      | (15.4% to 15.4%) | 13.2%      | (11.8% to 13.8%) | 11.2%      | (9.0% to 12.3%)  | 9.5%       | (6.8% to 11.0%)  | 7.9%       | (5.1% to 9.8%)   |
| Low nicotine           | Māori Female     | 37.1%      | (37.1% to 37.1%) | 10.0%      | (5.3% to 13.1%)  | 3.6%       | (1.4% to 5.3%)   | 2.6%       | (1.1% to 4.2%)   | 1.7%       | (0.8% to 3.3%)   |
|                        | non-Māori Female | 11.8%      | (11.8% to 11.8%) | 3.1%       | (1.7% to 4.1%)   | 1.1%       | (0.5% to 1.6%)   | 0.8%       | (0.4% to 1.3%)   | 0.5%       | (0.3% to 1.0%)   |
|                        | Māori Male       | 30.6%      | (30.6% to 30.6%) | 7.7%       | (4.1% to 9.9%)   | 2.6%       | (1.0% to 3.8%)   | 1.6%       | (0.8% to 2.8%)   | 0.9%       | (0.5% to 2.1%)   |
|                        | non-Māori Male   | 13.1%      | (13.1% to 13.1%) | 3.6%       | (1.9% to 4.7%)   | 1.4%       | (0.5% to 1.9%)   | 1.0%       | (0.5% to 1.5%)   | 0.7%       | (0.4% to 1.3%)   |
|                        | All              | 15.4%      | (15.4% to 15.4%) | 4.1%       | (2.2% to 5.4%)   | 1.5%       | (0.6% to 2.2%)   | 1.0%       | (0.5% to 1.7%)   | 0.7%       | (0.4% to 1.4%)   |
| Low nicotine + media   | Māori Female     | 37.1%      | (37.1% to 37.1%) | 10.0%      | (5.3% to 13.0%)  | 3.6%       | (1.4% to 5.3%)   | 2.6%       | (1.1% to 4.2%)   | 1.7%       | (0.8% to 3.3%)   |
|                        | non-Māori Female | 11.8%      | (11.8% to 11.8%) | 3.1%       | (1.7% to 4.1%)   | 1.1%       | (0.5% to 1.6%)   | 0.8%       | (0.4% to 1.3%)   | 0.5%       | (0.3% to 1.0%)   |
|                        | Māori Male       | 30.6%      | (30.6% to 30.6%) | 7.7%       | (4.1% to 9.9%)   | 2.6%       | (1.0% to 3.8%)   | 1.6%       | (0.8% to 2.8%)   | 0.9%       | (0.5% to 2.1%)   |
|                        | non-Māori Male   | 13.1%      | (13.1% to 13.1%) | 3.6%       | (1.9% to 4.7%)   | 1.4%       | (0.5% to 1.9%)   | 1.0%       | (0.5% to 1.5%)   | 0.7%       | (0.4% to 1.3%)   |
|                        | All              | 15.4%      | (15.4% to 15.4%) | 4.1%       | (2.2% to 5.3%)   | 1.5%       | (0.6% to 2.2%)   | 1.0%       | (0.5% to 1.7%)   | 0.7%       | (0.4% to 1.4%)   |
| Retail reduction       | Māori Female     | 37.1%      | (37.1% to 37.1%) | 25.8%      | (22.6% to 28.5%) | 22.0%      | (17.4% to 25.6%) | 18.7%      | (13.3% to 23.2%) | 15.8%      | (10.1% to 21.0%) |
|                        | non-Māori Female | 11.8%      | (11.8% to 11.8%) | 8.1%       | (7.0% to 8.8%)   | 6.9%       | (5.3% to 7.8%)   | 5.8%       | (4.0% to 6.9%)   | 4.8%       | (3.0% to 6.1%)   |
|                        | Māori Male       | 30.6%      | (30.6% to 30.6%) | 19.8%      | (17.0% to 22.1%) | 16.0%      | (12.1% to 19.1%) | 12.9%      | (8.6% to 16.5%)  | 10.4%      | (6.1% to 14.2%)  |
|                        | non-Māori Male   | 13.1%      | (13.1% to 13.1%) | 9.2%       | (8.0% to 9.8%)   | 8.1%       | (6.2% to 8.8%)   | 6.9%       | (4.8% to 7.9%)   | 5.8%       | (3.7% to 7.1%)   |
|                        | All              | 15.4%      | (15.4% to 15.4%) | 10.6%      | (9.2% to 11.5%)  | 9.1%       | (7.0% to 10.2%)  | 7.7%       | (5.3% to 9.1%)   | 6.4%       | (4.0% to 8.1%)   |
| Smokefree generation   | Māori Female     | 37.1%      | (37.1% to 37.1%) | 32.1%      | (28.9% to 33.9%) | 25.4%      | (20.3% to 28.7%) | 19.7%      | (14.0% to 23.6%) | 15.3%      | (9.7% to 19.6%)  |
|                        | Māori Male       | 30.6%      | (30.6% to 30.6%) | 24.8%      | (21.9% to 26.5%) | 18.4%      | (14.2% to 21.3%) | 13.3%      | (9.1% to 16.7%)  | 9.8%       | (6.0% to 13.2%)  |
|                        | non-Māori Female | 11.8%      | (11.8% to 11.8%) | 10.1%      | (9.1% to 10.8%)  | 8.2%       | (6.6% to 9.3%)   | 6.6%       | (4.7% to 7.9%)   | 5.2%       | (3.4% to 6.7%)   |
|                        | non-Māori Male   | 13.1%      | (13.1% to 13.1%) | 11.5%      | (10.3% to 12.1%) | 9.5%       | (7.7% to 10.5%)  | 7.8%       | (5.6% to 9.0%)   | 6.2%       | (4.1% to 7.7%)   |
|                        | All              | 15.4%      | (15.4% to 15.4%) | 13.4%      | (12.0% to 14.1%) | 10.9%      | (8.7% to 12.3%)  | 8.7%       | (6.2% to 10.4%)  | 6.9%       | (4.4% to 8.8%)   |
| Combined interventions | Māori Female     | 37.1%      | (37.1% to 37.1%) | 8.2%       | (4.3% to 10.5%)  | 2.9%       | (1.1% to 4.3%)   | 2.1%       | (0.9% to 3.4%)   | 1.4%       | (0.7% to 2.7%)   |
|                        | non-Māori Female | 11.8%      | (11.8% to 11.8%) | 2.5%       | (1.3% to 3.3%)   | 0.9%       | (0.4% to 1.3%)   | 0.7%       | (0.3% to 1.1%)   | 0.5%       | (0.3% to 0.9%)   |
|                        | Māori Male       | 30.6%      | (30.6% to 30.6%) | 6.3%       | (3.4% to 7.9%)   | 2.1%       | (0.9% to 3.1%)   | 1.3%       | (0.6% to 2.3%)   | 0.8%       | (0.5% to 1.8%)   |
|                        | non-Māori Male   | 13.1%      | (13.1% to 13.1%) | 2.9%       | (1.5% to 3.8%)   | 1.1%       | (0.5% to 1.6%)   | 0.8%       | (0.4% to 1.3%)   | 0.6%       | (0.4% to 1.1%)   |
|                        | All              | 15.4%      | (15.4% to 15.4%) | 3.3%       | (1.8% to 4.3%)   | 1.2%       | (0.5% to 1.8%)   | 0.9%       | (0.4% to 1.4%)   | 0.6%       | (0.4% to 1.2%)   |

Table S24. Absolute change in premature deaths (i.e., before age 75 years)

| Population | Year         | BAU       | Denicotinisation |                      | Denicotinisation + media |                      | Retail reduction |                    | Smokefree generation |                | Combined interventions |                      |
|------------|--------------|-----------|------------------|----------------------|--------------------------|----------------------|------------------|--------------------|----------------------|----------------|------------------------|----------------------|
|            |              | Estimate  | Estimate         | 95% UI               | Estimate                 | 95% UI               | Estimate         | 95% UI             | Estimate             | 95% UI         | Estimate               | 95% UI               |
| Māori      | 2020 to 2030 | 49,731    | -437             | (-567 to -306)       | -443                     | (-571 to -315)       | -147             | (-208 to -98)      | -1                   | (-1 to 0)      | -503                   | (-616 to -392)       |
|            | 2030 to 2040 | 64,618    | -2,703           | (-3,341 to -2,060)   | -2,727                   | (-3,362 to -2,094)   | -671             | (-976 to -435)     | -17                  | (-22 to -13)   | -2871                  | (-3,485 to -2,264)   |
|            | 2040 to 2050 | 83,543    | -5,024           | (-6,183 to -3,872)   | -5,058                   | (-6,214 to -3,915)   | -1,092           | (-1,603 to -706)   | -120                 | (-148 to -93)  | -5232                  | (-6,349 to -4,134)   |
|            | 2020 to 2040 | 114,349   | -3,137           | (-3,891 to -2,374)   | -3,172                   | (-3,916 to -2,420)   | -818             | (-1,178 to -535)   | -18                  | (-22 to -13)   | -3371                  | (-4,075 to -2,664)   |
|            | 2020 to 2050 | 197,892   | -8,159           | (-10,018 to -6,253)  | -8,223                   | (-10,070 to -6,335)  | -1,910           | (-2,777 to -1,244) | -138                 | (-170 to -106) | -8614                  | (-10,423 to -6,807)  |
|            |              |           |                  |                      |                          |                      |                  |                    |                      |                |                        |                      |
| Non-Māori  | 2020 to 2030 | 336,543   | -675             | (-881 to -473)       | -684                     | (-887 to -485)       | -231             | (-328 to -153)     | -1                   | (-1 to 0)      | -778                   | (-957 to -609)       |
|            | 2030 to 2040 | 431,519   | -4,137           | (-5,156 to -3,128)   | -4,170                   | (-5,176 to -3,173)   | -1,051           | (-1,526 to -681)   | -15                  | (-19 to -10)   | -4396                  | (-5,346 to -3,475)   |
|            | 2040 to 2050 | 531,435   | -7,803           | (-9,683 to -5,919)   | -7,853                   | (-9,712 to -6,001)   | -1,792           | (-2,655 to -1,153) | -55                  | (-72 to -40)   | -8125                  | (-9,940 to -6,321)   |
|            | 2020 to 2040 | 768,062   | -4,804           | (-5,997 to -3,609)   | -4,846                   | (-6,033 to -3,681)   | -1,282           | (-1,857 to -835)   | -15                  | (-20 to -11)   | -5179                  | (-6,292 to -4,092)   |
|            | 2020 to 2050 | 1,299,497 | -12,610          | (-15,698 to -9,562)  | -12,698                  | (-15,729 to -9,693)  | -3,072           | (-4,526 to -1,984) | -70                  | (-92 to -51)   | -13313                 | (-16,113 to -10,512) |
|            |              |           |                  |                      |                          |                      |                  |                    |                      |                |                        |                      |
| All        | 2020 to 2030 | 386,274   | -1,112           | (-1,444 to -780)     | -1,128                   | (-1,454 to -803)     | -378             | (-535 to -251)     | -1                   | (-2 to -1)     | -1280                  | (-1,569 to -1,001)   |
|            | 2030 to 2040 | 496,137   | -6,837           | (-8,481 to -5,200)   | -6,889                   | (-8,511 to -5,270)   | -1,720           | (-2,505 to -1,116) | -32                  | (-40 to -23)   | -7266                  | (-8,821 to -5,756)   |
|            | 2040 to 2050 | 614,978   | -12,821          | (-15,848 to -9,813)  | -12,908                  | (-15,914 to -9,918)  | -2,885           | (-4,275 to -1,853) | -175                 | (-216 to -134) | -13367                 | (-16,233 to -10,485) |
|            | 2020 to 2040 | 882,411   | -7,940           | (-9,892 to -5,984)   | -8,014                   | (-9,961 to -6,096)   | -2,103           | (-3,031 to -1,365) | -33                  | (-42 to -24)   | -8543                  | (-10,367 to -6,777)  |
|            | 2020 to 2050 | 1,497,389 | -20,806          | (-25,718 to -15,805) | -20,955                  | (-25,772 to -16,026) | -4,987           | (-7,308 to -3,228) | -209                 | (-258 to -159) | -21939                 | (-26,599 to -17,386) |

Table S25. Relative percentage change in premature deaths (i.e., before age 75 years)

| Population     | Year         | BAU      | Denicotinisation |                  | Denicotinisation + media |                  | Retail reduction |                  | Smokefree generation |                  | Combined interventions |                  |
|----------------|--------------|----------|------------------|------------------|--------------------------|------------------|------------------|------------------|----------------------|------------------|------------------------|------------------|
|                |              | Estimate | % Change         | 95% UI           | % Change                 | 95% UI           | % Change         | 95% UI           | % Change             | 95% UI           | % Change               | 95% UI           |
| Māori          | 2020 to 2030 | 49731    | -0.88            | (-1.14 to -0.61) | -0.89                    | (-1.15 to -0.63) | -0.30            | (-0.42 to -0.20) | 0.00                 | (0.00 to 0.00)   | -1.01                  | (-1.24 to -0.79) |
|                | 2030 to 2040 | 64618    | -4.18            | (-5.17 to -3.19) | -4.22                    | (-5.20 to -3.24) | -1.04            | (-1.51 to -0.67) | -0.03                | (-0.03 to -0.02) | -4.44                  | (-5.39 to -3.50) |
|                | 2040 to 2050 | 83543    | -6.01            | (-7.40 to -4.63) | -6.05                    | (-7.44 to -4.69) | -1.31            | (-1.92 to -0.84) | -0.14                | (-0.18 to -0.11) | -6.26                  | (-7.60 to -4.95) |
|                | 2020 to 2040 | 114349   | -2.74            | (-3.40 to -2.08) | -2.77                    | (-3.42 to -2.12) | -0.72            | (-1.03 to -0.47) | -0.02                | (-0.02 to -0.01) | -2.95                  | (-3.56 to -2.33) |
|                | 2020 to 2050 | 197892   | -4.12            | (-5.06 to -3.16) | -4.16                    | (-5.09 to -3.20) | -0.97            | (-1.40 to -0.63) | -0.07                | (-0.09 to -0.05) | -4.35                  | (-5.27 to -3.44) |
|                |              |          |                  |                  |                          |                  |                  |                  |                      |                  |                        |                  |
| Non-Māori      | 2020 to 2030 | 336543   | -0.20            | (-0.26 to -0.14) | -0.20                    | (-0.26 to -0.14) | -0.07            | (-0.10 to -0.05) | 0.00                 | (0.00 to 0.00)   | -0.23                  | (-0.28 to -0.18) |
|                | 2030 to 2040 | 431519   | -0.96            | (-1.19 to -0.72) | -0.97                    | (-1.20 to -0.74) | -0.24            | (-0.35 to -0.16) | 0.00                 | (0.00 to 0.00)   | -1.02                  | (-1.24 to -0.81) |
|                | 2040 to 2050 | 531435   | -1.47            | (-1.82 to -1.11) | -1.48                    | (-1.83 to -1.13) | -0.34            | (-0.50 to -0.22) | -0.01                | (-0.01 to -0.01) | -1.53                  | (-1.87 to -1.19) |
|                | 2020 to 2040 | 768062   | -0.63            | (-0.78 to -0.47) | -0.63                    | (-0.79 to -0.48) | -0.17            | (-0.24 to -0.11) | 0.00                 | (0.00 to 0.00)   | -0.67                  | (-0.82 to -0.53) |
|                | 2020 to 2050 | 1299497  | -0.97            | (-1.21 to -0.74) | -0.98                    | (-1.21 to -0.75) | -0.24            | (-0.35 to -0.15) | -0.01                | (-0.01 to 0.00)  | -1.02                  | (-1.24 to -0.81) |
|                |              |          |                  |                  |                          |                  |                  |                  |                      |                  |                        |                  |
| All population | 2020 to 2030 | 386274   | -0.29            | (-0.37 to -0.20) | -0.29                    | (-0.38 to -0.21) | -0.10            | (-0.14 to -0.06) | 0.00                 | (0.00 to 0.00)   | -0.33                  | (-0.41 to -0.26) |
|                | 2030 to 2040 | 496137   | -1.38            | (-1.71 to -1.05) | -1.39                    | (-1.72 to -1.06) | -0.35            | (-0.50 to -0.22) | -0.01                | (-0.01 to 0.00)  | -1.46                  | (-1.78 to -1.16) |
|                | 2040 to 2050 | 614978   | -2.08            | (-2.58 to -1.60) | -2.10                    | (-2.59 to -1.61) | -0.47            | (-0.70 to -0.30) | -0.03                | (-0.04 to -0.02) | -2.17                  | (-2.64 to -1.70) |
|                | 2020 to 2040 | 882411   | -0.90            | (-1.12 to -0.68) | -0.91                    | (-1.13 to -0.69) | -0.24            | (-0.34 to -0.15) | 0.00                 | (0.00 to 0.00)   | -0.97                  | (-1.17 to -0.77) |
|                | 2020 to 2050 | 1497389  | -1.39            | (-1.72 to -1.06) | -1.40                    | (-1.72 to -1.07) | -0.33            | (-0.49 to -0.22) | -0.01                | (-0.02 to -0.01) | -1.47                  | (-1.78 to -1.16) |

Figure S3. Comparison of total health gains from tobacco endgame strategies modelled in this paper, with those we have previously modelled for the ANZ population of food taxes and subsidies<sup>14</sup>, colorectal cancer screening<sup>15</sup>, and 10% per annum increases in tobacco tax<sup>16</sup>

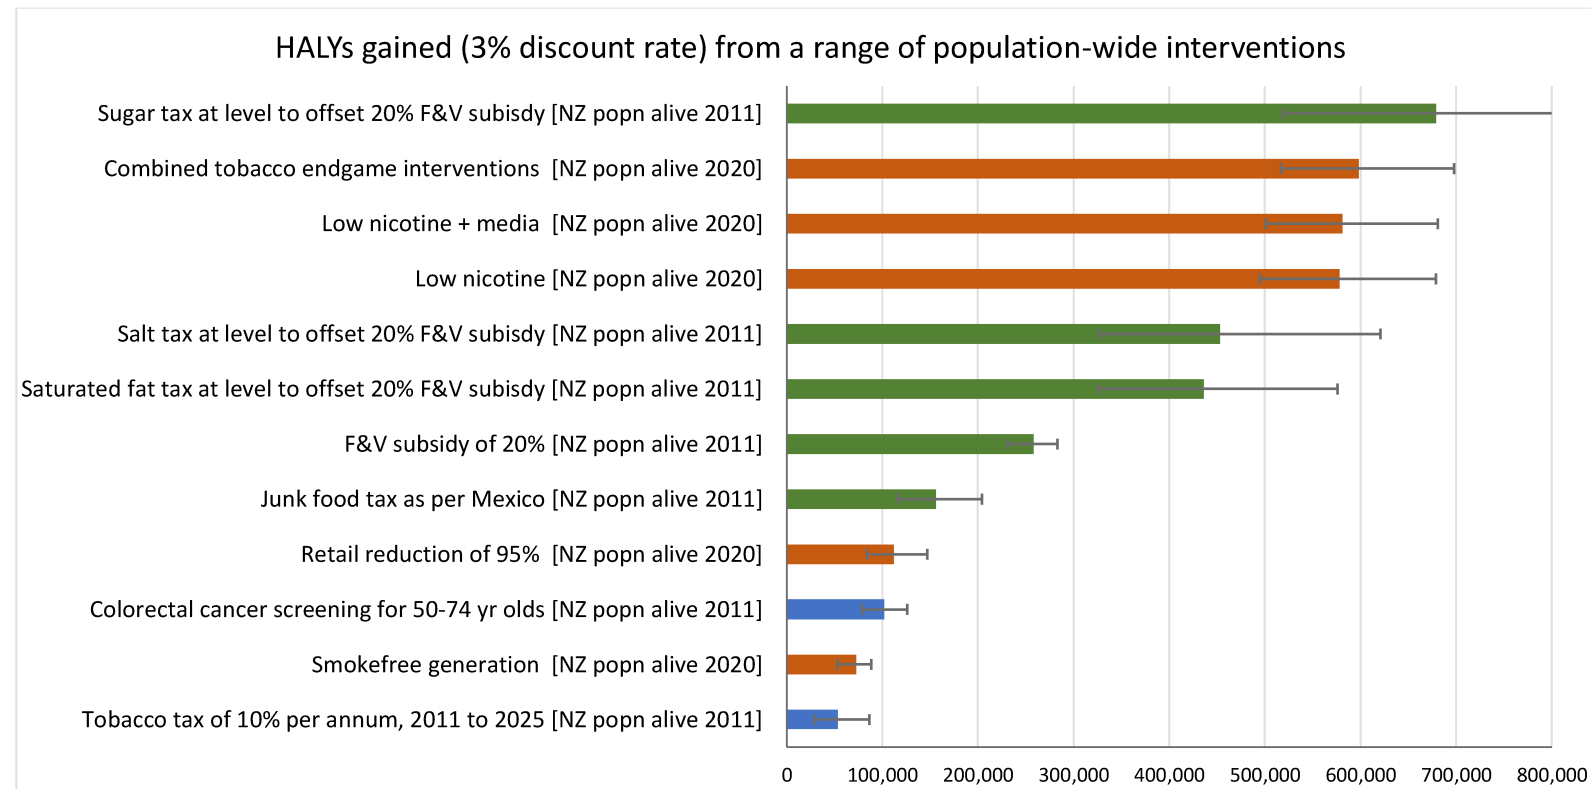



Table S26. Health gain (in HALYs gained; 3% discount rate) per 1,000 people alive in 2020 (base-year) in Aotearoa/New Zealand by the modelled policies, by timeline into the future

| Population       | Years        | Low nicotine |                                     | Low nicotine + media |                                     | Retail reduction |                                     | Smokefree generation |                                     | Combined interventions |                                     |
|------------------|--------------|--------------|-------------------------------------|----------------------|-------------------------------------|------------------|-------------------------------------|----------------------|-------------------------------------|------------------------|-------------------------------------|
|                  |              | Estimate     | Relative risk compared to non-Māori | Estimate             | Relative risk compared to non-Māori | Estimate         | Relative risk compared to non-Māori | Estimate             | Relative risk compared to non-Māori | Estimate               | Relative risk compared to non-Māori |
| Māori female     | 2020 to 2030 | 0.29         | 3.23                                | 0.30                 | 3.24                                | 0.11             | 3.13                                | 0.01                 | 4.91                                | 0.34                   | 3.24                                |
|                  | 2031 to 2040 | 4.26         | 3.45                                | 4.26                 | 3.46                                | 1.13             | 3.36                                | 0.13                 | 4.65                                | 4.54                   | 3.44                                |
|                  | 2041 to 2131 | 37.80        | 4.62                                | 37.80                | 4.58                                | 6.20             | 3.82                                | 7.66                 | 8.48                                | 39.02                  | 4.57                                |
|                  | All          | 16.89        | 4.73                                | 16.99                | 4.73                                | 2.91             | 3.96                                | 3.23                 | 9.01                                | 17.50                  | 4.75                                |
| Non-Māori female | 2020 to 2030 | 0.09         | 1                                   | 0.09                 | 1                                   | 0.03             | 1                                   | 0.00                 | 1                                   | 0.10                   | 1                                   |
|                  | 2031 to 2040 | 1.23         | 1                                   | 1.24                 | 1                                   | 0.34             | 1                                   | 0.03                 | 1                                   | 1.32                   | 1                                   |
|                  | 2041 to 2131 | 8.20         | 1                                   | 8.26                 | 1                                   | 1.62             | 1                                   | 0.90                 | 1                                   | 8.48                   | 1                                   |
|                  | All          | 3.55         | 1                                   | 3.57                 | 1                                   | 0.73             | 1                                   | 0.36                 | 1                                   | 3.68                   | 1                                   |
| Māori male       | 2020 to 2030 | 0.19         | 1.79                                | 0.19                 | 1.80                                | 0.07             | 1.78                                | 0.01                 | 3.45                                | 0.21                   | 1.80                                |
|                  | 2031 to 2040 | 2.50         | 1.81                                | 2.51                 | 1.82                                | 0.68             | 1.81                                | 0.09                 | 3.16                                | 2.67                   | 1.82                                |
|                  | 2041 to 2131 | 18.58        | 2.03                                | 18.66                | 2.03                                | 3.30             | 1.84                                | 3.43                 | 3.44                                | 19.20                  | 2.04                                |
|                  | All          | 8.30         | 2.12                                | 8.33                 | 2.12                                | 1.54             | 1.93                                | 1.42                 | 3.61                                | 8.59                   | 2.12                                |
| Non-Māori male   | 2020 to 2030 | 0.10         | 1                                   | 0.11                 | 1                                   | 0.04             | 1                                   | 0.00                 | 1                                   | 0.12                   | 1                                   |
|                  | 2031 to 2040 | 1.37         | 1                                   | 1.38                 | 1                                   | 0.37             | 1                                   | 0.03                 | 1                                   | 1.47                   | 1                                   |
|                  | 2041 to 2131 | 9.06         | 1                                   | 9.12                 | 1                                   | 1.78             | 1                                   | 1.00                 | 1                                   | 9.41                   | 1                                   |
|                  | All          | 3.88         | 1                                   | 3.92                 | 1                                   | 0.80             | 1                                   | 0.39                 | 1                                   | 4.04                   | 1                                   |

HALYs gained are age-standardized to the 2020 Māori population. Because we model a closed cohort (all ANZers alive in 2020), in out-years the HALYs gained are increasingly only among the younger birth cohorts in 2020. The ‘missing’ older people in out-years is why the RR comparing Māori to non-Māori for all years combined is higher than the weighted average of the three sub-periods.

Table S27. Sensitivity of Health gains results to policy effect specifications\*

| Population     | Year         | Denicotinisation |                      | Denicotinisation + media |                      | Retail reduction |                     | Smokefree generation |                      | Combined interventions |                      |
|----------------|--------------|------------------|----------------------|--------------------------|----------------------|------------------|---------------------|----------------------|----------------------|------------------------|----------------------|
|                |              | Estimate         | 95% UI               | Estimate                 | 95% UI               | Estimate         | 95% UI              | Estimate             | 95% UI               | Estimate               | 95% UI               |
| Māori          | 2020 to 2030 | 1,050            | (901 to 1,130)       | 1,090                    | (934 to 1,167)       | 529              | (473 to 656)        | 37                   | (28 to 47)           | 1,430                  | (1,240 to 1,560)     |
|                | 2031 to 2040 | 10,700           | (9,060 to 12,100)    | 11,500                   | (9,777 to 12,793)    | 3,900            | (3,340 to 4,780)    | 514                  | (422 to 623)         | 12,900                 | (11,000 to 14,400)   |
|                | 2041 to 2131 | 151,000          | (112,000 to 190,000) | 183,000                  | (139,119 to 224,223) | 28,600           | (22,700 to 36,900)  | 71,300               | (53,800 to 83,500)   | 181,000                | (137,000 to 225,000) |
|                | All          | 163,000          | (122,000 to 203,000) | 196,000                  | (149,920 to 238,183) | 33,200           | (26,500 to 42,100)  | 71,900               | (54,400 to 84,000)   | 195,000                | (149,000 to 241,000) |
| Non-Māori      | 2020 to 2030 | 2,230            | (1,910 to 2,390)     | 2,310                    | (1,973 to 2,456)     | 1,150            | (1,020 to 1,430)    | 47                   | (35 to 62)           | 3,030                  | (2,620 to 3,330)     |
|                | 2031 to 2040 | 22,200           | (18,400 to 24,300)   | 23,600                   | (19,723 to 25,693)   | 8,060            | (6,930 to 10,100)   | 757                  | (600 to 937)         | 26,700                 | (22,300 to 29,100)   |
|                | 2041 to 2131 | 245,000          | (175,000 to 294,000) | 294,000                  | (214,785 to 341,991) | 55,100           | (42,900 to 71,500)  | 78,300               | (57,500 to 89,000)   | 287,000                | (208,000 to 342,000) |
|                | All          | 269,000          | (195,000 to 320,000) | 320,000                  | (236,709 to 370,125) | 64,800           | (50,900 to 83,000)  | 79,200               | (58,300 to 89,800)   | 317,000                | (234,000 to 374,000) |
| All population | 2020 to 2030 | 3,270            | (2,810 to 3,510)     | 3,390                    | (2,907 to 3,623)     | 1,680            | (1,500 to 2,090)    | 84                   | (63 to 109)          | 4,460                  | (3,860 to 4,880)     |
|                | 2031 to 2040 | 33,000           | (27,500 to 36,400)   | 35,100                   | (29,500 to 38,486)   | 12,000           | (10,300 to 14,800)  | 1,270                | (1,020 to 1,560)     | 39,600                 | (33,300 to 43,300)   |
|                | 2041 to 2131 | 395,000          | (287,000 to 484,000) | 477,000                  | (353,905 to 566,214) | 83,800           | (65,600 to 108,000) | 150,000              | (111,000 to 173,000) | 468,000                | (345,000 to 566,000) |
|                | All          | 432,000          | (318,000 to 524,000) | 516,000                  | (386,629 to 608,307) | 98,000           | (77,400 to 125,000) | 151,000              | (113,000 to 174,000) | 513,000                | (383,000 to 614,000) |

\* Denicotinisation policy set at the lower end of effectiveness (i.e., 97.5th percentile values of: the percentage reduction in smoking prevalence due to increased cessation over and above BAU of 67.1%, and the percentage reduction in initiation of 78.5%), and retail outlet reduction and the tobacco free generation set to their expected or median input values.

## References

1. Petrović-van der Deen FS, Wilson N, Crothers A, Cleghorn CL, Gartner C, Blakely T. Potential Country-level health and Cost Impacts of Legalizaing Domestic Sale of Vaporized Nicotine Products. *Epidemiol* 2019; **30**(3): 396-404.
2. Statistics New Zealand - Tauranga Aotearoa. Cigarette smoking behaviour. 2013. <http://datainfolplus.stats.govt.nz/Item/nz.govt.stats/1952b9bc-e2d0-419c-8682-398bc4ea16bc> (accessed 11 March 2021).
3. Zhu S-H, Zhuang Y-L, Wong S, Cummins SE, Tedeschi GJ. E-cigarette use and associated changes in population smoking cessation: evidence from US current population surveys. *BMJ* 2017; **358**: j3262.
4. Petrovic-van der Deen FS, Wilson N, Crothers A, Cleghorn CL, Gartner C, Blakely T. Potential Country-level Health and Cost Impacts of Legalizing Domestic Sale of Vaporized Nicotine Products. *Epidemiol* 2019; **30**(3): 396-404.
5. Doan TTT, Tan KW, Dickens BSL, Lean YA, Yang Q, Cook AR. Evaluating smoking control policies in the e-cigarette era: a modelling study. *Tobacco control* 2020; **29**(5): 522-30.
6. Ministry of Health. Health loss in New Zealand: A report from the New Zealand burden of diseases, injuries and risk factors study, 2006–2016: Ministry of Health Wellington, 2013.
7. Blakely T, Barendregt JJ, Foster RH, et al. The association of active smoking with multiple cancers: national census-cancer registry cohorts with quantitative bias analysis. *Cancer Causes Control* 2013; **24**: 1243–55.
8. WHO. Tobacco smoke and involuntary smoking. Geneva: World Health Organization, 2002.
9. Morgenstern H, Bursic ES. A method for using epidemiologic data to estimate the potential impact of an intervention on the health status of a target population. *Journal of Community Health* 1982; **7**(4): 292-309.
10. Hunt D. Mortality from smoking in New Zealand. Dunedin: University of Otago; 2003.
11. Hunt D, Blakely T, Woodward A, Wilson N. The smoking-mortality association varies over time and by ethnicity in New Zealand. *Int J Epidemiol* 2005; **34**(5): 1020-8.
12. Thun M, Apicella L, Henley S. Smoking vs other risk factors as the cause of smoking-attributable deaths: confounding in the courtroom. *JAMA* 2000; **284**(6): 706-12.
13. Hoogenveen R, van Baal PH, Boshuizen H, Feenstra T. Dynamic effects of smoking cessation on disease incidence, mortality and quality of life: The role of time since cessation. *Cost Eff Resour Alloc* 2008; **6**(1).
14. Apelberg BJ, Feirman SP, Salazar E, et al. Potential Public Health Effects of Reducing Nicotine Levels in Cigarettes in the United States. *New England Journal of Medicine* 2018; **378**(18): 1725-33.
